# Supplementary material for: A family of unusual immunoglobulin superfamily genes in an invertebrate histocompatibility complex
Source: PubMed Central journal article supplement — Proc Natl Acad Sci U S A. 2022 Sep 26;119(40):e2207374119. doi: 10.1073/pnas.2207374119 (PMC9546547; doi:10.1073/pnas.2207374119), 2022-09-26
Supplement: pnas.2207374119.sapp.pdf [file pnas.2207374119.sapp.pdf]

## Supplementary Information for

### A family of unusual immunoglobulin superfamily genes in an invertebrate histocompatibility complex

Aidan L. Huene<sup>1,2</sup>, Steven M. Sanders<sup>1,2</sup>, Zhiwei Ma<sup>1,2</sup>, Anh-Dao Nguyen<sup>3</sup>, Sergey Koren<sup>3</sup>, Manuel H. Michaca<sup>1,2</sup>, Jim C. Mullikin<sup>3,4</sup>, Adam M. Phillippy<sup>3</sup>, Christine E. Schnitzler<sup>5,6</sup>, Andreas D. Baxevanis<sup>3</sup>, and Matthew L. Nicotra<sup>1,2,7</sup>

#### Affiliations:

<sup>1</sup> Starzl Transplantation Institute, University of Pittsburgh, Pittsburgh, PA, USA

<sup>2</sup> Center for Evolutionary Biology and Medicine, University of Pittsburgh, Pittsburgh, PA, USA

<sup>3</sup> Computational and Statistical Genomics Branch, National Human Genome Research Institute, National Institutes of Health, Bethesda, MD, USA

<sup>4</sup> NIH Intramural Sequencing Center, National Institutes of Health, Rockville, MD, USA

<sup>5</sup> Whitney Laboratory for Marine Bioscience, University of Florida, St. Augustine, FL, USA

<sup>6</sup> Department of Biology, University of Florida, Gainesville, FL USA

<sup>7</sup> Department of Immunology, University of Pittsburgh, Pittsburgh, PA, USA

\*Corresponding Author: Matthew L. Nicotra

Email: [matthew.nicotra@pitt.edu](mailto:matthew.nicotra@pitt.edu)

**This PDF file includes:**

Supplementary Materials and Methods  
Figures S1 to S23  
Tables S1 to S9

Legends for Datasets S1 to S14

SI References

**Other supplementary materials for this manuscript include the following:**

Datasets S1 to S14

## Supplementary Information Text

### Material and Methods

#### Sequencing and assembly of the genome of an ARC homozygous animal

Colony 236-21 was maintained on glass microscope slides in 38 liter aquaria filled with artificial seawater (Reef Crystals) as previously described (1). It was starved three days prior to nucleic acid extraction. Tissue was scraped from the slide with a sterile razor blade and snap-frozen by transferring it to a mortar filled with liquid nitrogen. The frozen tissue was then ground into a fine powder with a pestle. UEB1 buffer (7 M urea, 0.3125 M NaCl, 0.05 M Tris-HCl, 0.02 M EDTA, and 1% w:v N-lauroylsarcosine sodium salt) was added to the mortar, where it froze. The frozen UEB1-tissue mixture was ground into a powder and transferred to a 50 ml centrifuge tube containing room temperature UEB1 buffer. This was mixed by gentle inversion. An equal volume of equilibrated phenol:chloroform:isoamyl alcohol (25:24:1) was added and mixed by gentle inversion. This was centrifuged for 10 minutes at 3000 x g. The aqueous layer was transferred to a 15 ml centrifuge tube with a wide bore pipette tip. Total nucleic acid was precipitated by adding 0.7 volume isopropyl alcohol. Precipitated nucleic acid was then spooled onto a pipette tip and transferred to a clean 15 ml tube, where it was washed twice with 70% EtOH and twice with 100% EtOH. The precipitated material was then gently brought to the bottom of the tube by briefly centrifuging, air dried, and immediately resuspended in 1X TE (10 mM Tris-HCl, pH 8.0; 1 mM EDTA, pH 8.0). RNA was then digested by adding RNAses (RNase cocktail, Ambion, #AM2286) and incubating at 37°C for 15 minutes. DNA was then extracted by adding 1 volume equilibrated phenol:chloroform:isoamyl alcohol, centrifugation at 12,000 x g, and transfer of the aqueous layer to a new tube. This was followed by precipitation with 2.5 volumes of 100% ethanol and 1/10 volume 5 M sodium acetate (pH 5.2). The precipitate was pelleted, washed with 70% ethanol, and resuspended with 1X TE. The resuspended DNA was then stored at -20°C.

PacBio and Illumina libraries were constructed and sequencing performed at the NIH Intramural Sequencing Center (NISC) via a whole-genome shotgun approach. Both the high-throughput Illumina HiSeq2500, run as 250 base paired-end reads, and PacBio RSII long-read sequencing platforms were used. Filtered subreads from two PacBio libraries (a total of 37 SMRT cells) were corrected with the Celera Assembler version 8.3r2 (2). Specifically, the PBcR.pl script was used with parameter sensitive=1, which is recommended for datasets with <50x coverage, increases MHAP sensitivity, and uses the slower but more accurate pdbagcon consensus algorithm to generate the corrected reads. The corrected reads were assembled with runCA.pl parameters batOptions="-el 5000 -eg 0.025 -Eg 4.00 -em 0.025 -Em 4.00 -o asm -RS -NS -CS -repeatdetect 6 150 15" which reduces the default error rate, increases the minimum overlap size, and increases the splitting thresholds. The resulting assembly was polished with the PacBio reads using the ArrowGrid parallel wrapper (3) followed by polishing with the Illumina short read data using the PilonGrid parallel wrapper (4).

## **Assembly of the ARC**

To assemble the full reference sequence for the ARC, NUCmer from the MUMmer package (v3.23) was used align the BAC contigs with the newly assembled whole genome sequence to identify the contigs which matched the known ARC sequence (5). First, the query and reference sequences were aligned using NUCmer (`nucmer -p <output.file> <reference.file> <query.file>`). The resulting file was then filtered (delta-filter) to only show matching hits in one direction on the strands (-r) and to remove all hits less than 1000 base pairs (-l #). Finally, the output was appended into a tab-delimited file (-T) sorted by the reference sequence (-r), with a minimum length of 1 kb or 10 kb (-L #), the sequence length (-l), and the percent coverage between two sequences (-c). The tabular files were manually inspected to assess overlapping contigs. Overlapping regions were then inspected by alignment with BLAST+ version 2.6.0 (6) and dot plots generated in YASS (7). The genome assembly and BAC sequences were then merged to create a reference sequence of the ARC-F haplotype (File S1).

## **RNA extraction, sequencing, and mapping**

Thirty polyps were severed from colony 236-21 with a scalpel, moved to an eppendorf tube and briefly centrifuged. Remaining water was removed with a pipette. Tissue was immediately lysed with 0.5 mL of TRIzol (Invitrogen) and ground vigorously with a small pestle. Lysate was incubated for less than five minutes at room temp. One hundred  $\mu$ l chloroform was added and the tube was shaken vigorously for 15 seconds, followed by a three minute incubation at room temp. The sample was then centrifuged at 12,000 x g for 15 minutes at 4°C. RNA was then extracted from the aqueous phase with a PureLink RNA Mini Kit (Invitrogen). RNA quality and quantitation was assessed by TapeStation and Qubit, respectively, at the University of Pittsburgh Genomics Core. Final sample was frozen and stored at -80°C until sequencing by NISC. RNA-Seq libraries were constructed from 1  $\mu$ g RNA using the Illumina TruSeq Stranded mRNA kit. The resulting cDNA was fragmented using a Covaris E210 focused ultrasonicator. Library amplification was performed using 10 cycles to minimize the risk of over-amplification. The library was sequenced on an Illumina HiSeq4000 to generate 75 base paired-end reads.

To calculate expression levels of our annotated Alr genes, paired-end RNA-seq reads were mapped to the entire genome assembly using HISAT2 (8). The mapping was performed under the most stringent conditions (only concordant mappings with zero mismatches were kept) while allowing for multiple alignments. The resulting mapping file was processed and sorted using samtools (9) before proceeding to quantitation. Using the reference annotations of the Alr genes, transcript abundance of the Alr genes was estimated with Cufflinks (10). Abundance estimates were corrected for multiple read mappings.



## Annotation of *Alr* genes

*Alr* genes were annotated using Apollo (11) installed on a local computer running Ubuntu 18 LTS. Tracks displaying the results of BLASTX searches and RNAseq mapping were imported and used as a guide for manual annotation of *Alr* gene models. To generate BLAST results, repeats in the genomic sequences were first masked using the protein-based repeat masking option on the Repeatmasker website (<https://www.repeatmasker.org>) (12). Masked DNA sequences were then divided into 32 kb segments with 2 kb overlaps. These segments were used as BLASTX queries against a database of Alr1 and Alr2 proteins (to identify *Alr*-like sequences), and the swissprot database (to identify highly conserved genes). BLAST results were then concatenated, and a custom perl script was used to adjust their coordinates to those of the unsegmented genome sequence. To generate RNAseq alignments, the assembled RNA-seq dataset was aligned to the genome using HISAT2 (v2.1.0) through the Galaxy platform (8, 13). The parameters used RNAseq alignments included paired-end reads and no alignments for individual mates, and only 1 primary alignment. The output file (.bam) was then imported to Apollo for visualization during annotation.

## Alr sequence comparisons

Alignments between Alr proteins were performed using MAFFT (14). The L-INS-i alignment strategy was used for all alignments except those involving only domains 1, 2, and 3, which used G-INS-i. Pairwise sequence alignments were done using the modified Needleman-Wunsch algorithm available in Jalview (15). Clustering was performed with CD-HIT (16) using the psi-cd-hit.pl script, with 20% sequence identity cutoff and 0.1 e-value cutoff. Neighbor joining trees were constructed in Jalview using the BLOSUM62 scoring matrix. Trees were visualized in iTOL (17), exported as scaled vector graphics files, and annotated in Adobe Illustrator.

## Protein sequence analysis

Signal peptides were predicted with SignalP 5.0 (18). Transmembrane helices were predicted with TMHMM 2.0 (19). Conserved protein domains were identified with the Pfam database (20) using HMMER3 (<http://hmmer.org/>). For domain prediction by HHpred, sequences were submitted to the MPI Bioinformatics Toolkit (21). The query MSA was generated via three iterations of HHblits against the Uniref30 database, with an e-value threshold of  $1 \times 10^{-3}$  for inclusion. HHpred was then used to search the SCOPe70\_2.07 database.

## Structural prediction and alignment

For single domain predictions, we generated a custom multiple sequence alignment which was submitted, along with the query sequence, to Colabfold via the “AlphaFold2\_mmseqs2” notebook, version 1.1 (22). The input multiple sequence alignment was generated as follows. The sequence of the query domain was aligned to the same domain type from all *bona fide* Alr proteins using MAFFT with the G-INS-i setting. This alignment was then submitted as a query to HHblits via the MPI

Bioinformatics Toolkit, which was run for two iterations against the Uniref30 database, with an e-value threshold of  $1 \times 10^{-3}$  for inclusion. A reduced representation alignment of the resulting Query MSA was then downloaded and submitted as a custom multiple sequence alignment to Colabfold. The secondary structure of each model was determined with STRIDE (23). The AIr structural model with the highest average pLDDT was then submitted to DALI (24) and PDBeFOLD (<https://www.ebi.ac.uk/msd-srv/ssm/>) (25) to identify similar structures in the PDB. For multi-domain predictions, the query sequence was submitted directly to Colabfold, with `msa_mode = "Mmseqs2 (Uniref + Environmental)"`. Models were visualized in Pymol 2.3 (26).

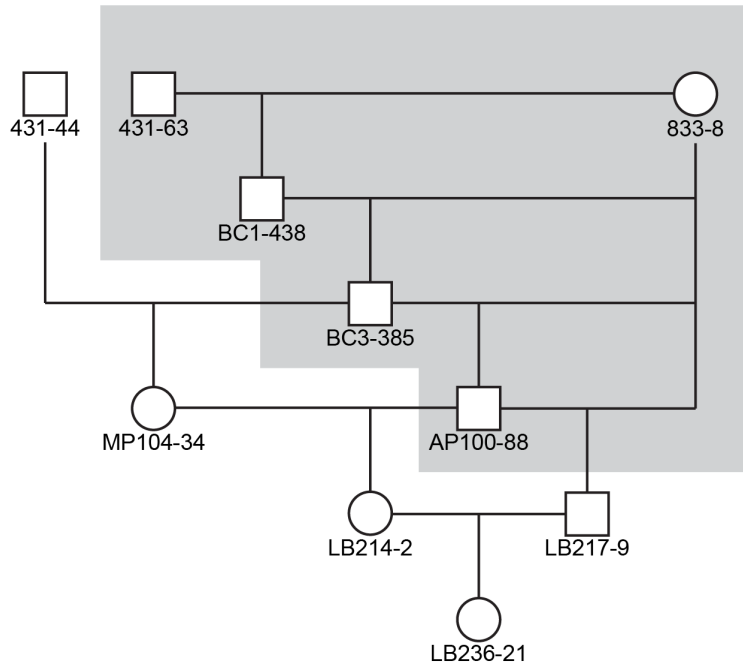

**Fig. S1. Pedigree of colonies used to generate ARC-F reference sequence.**

The pedigree of colony LB236-21 can be recreated by concatenating previously published pedigrees (shaded area) (1, 27). Colony AP100-88 is from the mapping population in Powell *et al.* (27). Colony 431-44 is from the mapping population in Cadavid *et al.* (1).

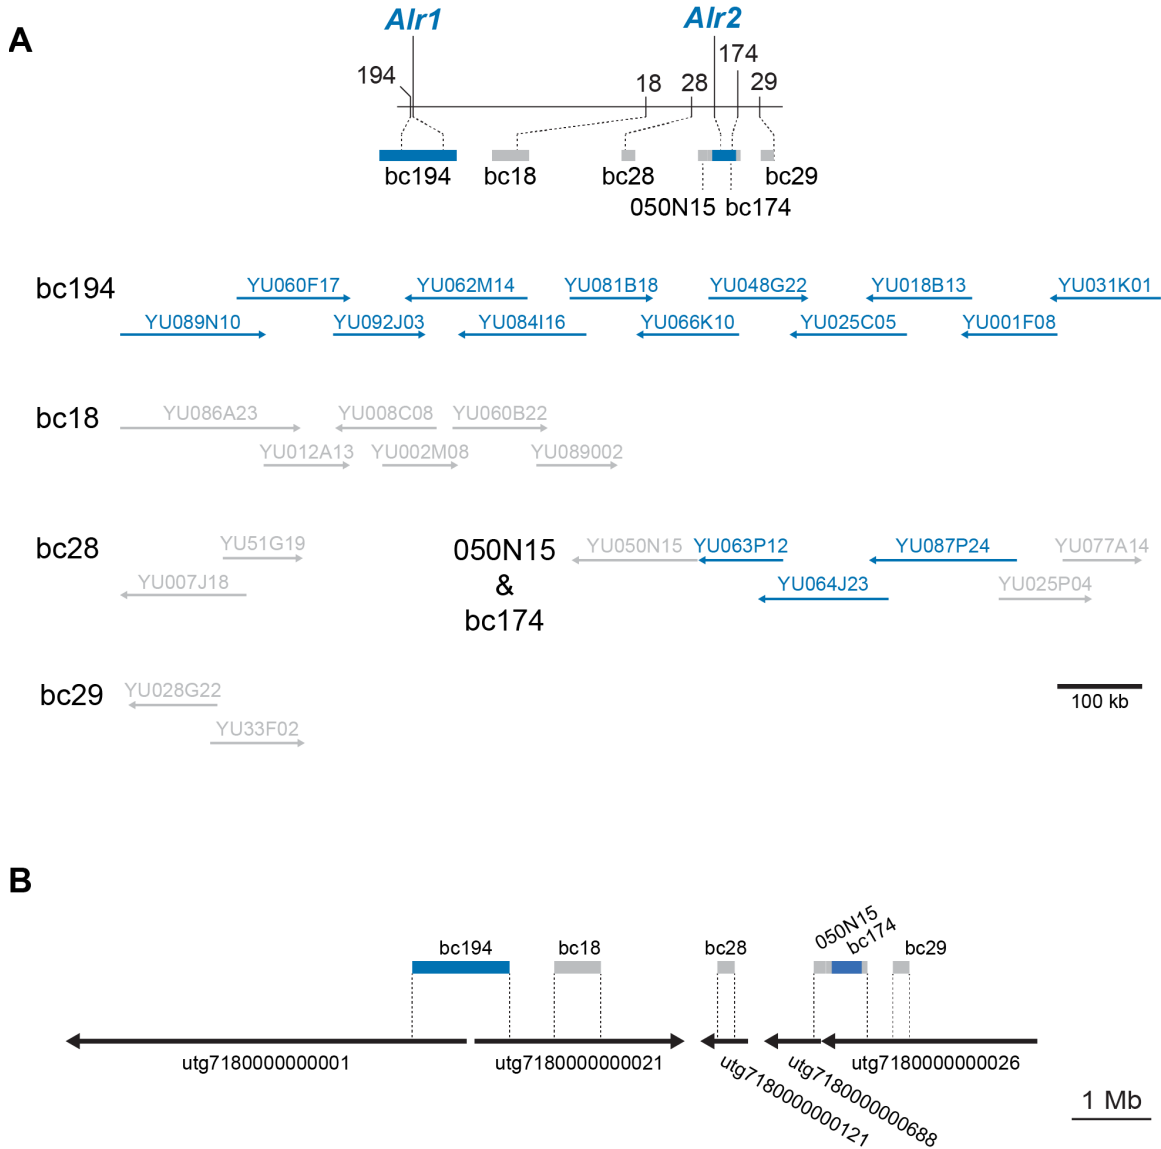

**Fig. S2. Detail of ARC reference assembly.**

- (A) Minimum tiling path of sequenced BAC clones resulting from chromosome walks from five markers in the ARC linkage map. Clone names are indicated above an arrow indicating their orientation. Sequences reported in (28) or (29) are in navy blue. Unpublished sequences are in gray.
- (B) Overlap between BAC contigs and genome contigs.

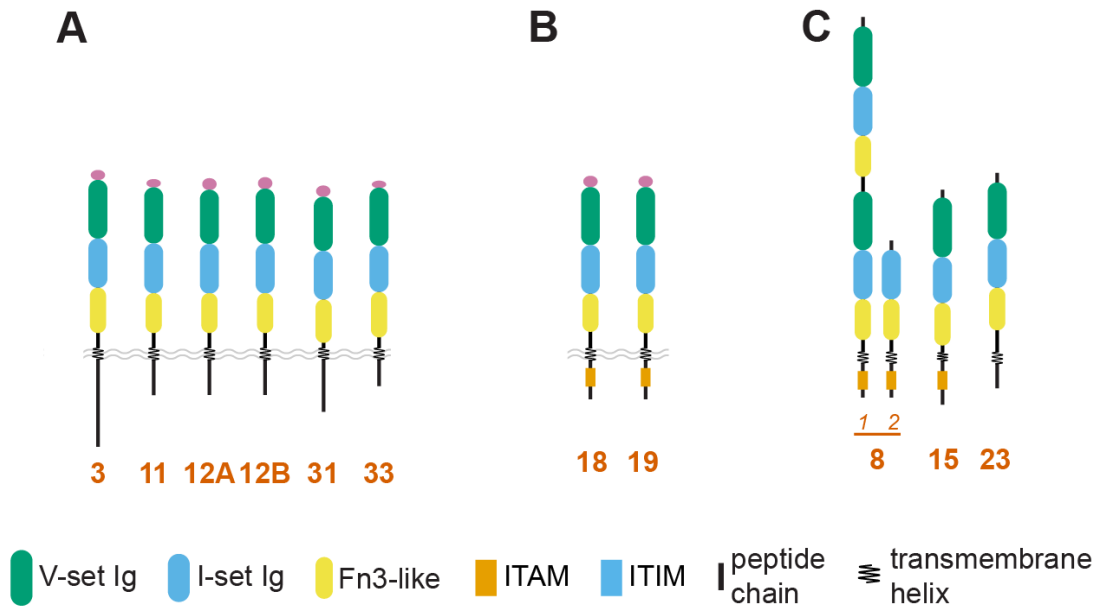

**Fig. S3. Predicted domain architectures of putative Alr proteins.**

(A) Domain architecture of proteins encoded by unexpressed putative genes.

(B) Domain architecture of proteins encoded by partially expressed putative genes.

(C) Domain architecture of proteins encoded by putative genes that are predicted to lack a signal peptide.

Final domain predictions and the presence of ITAM and ITIM motifs are indicated here and described later in the main text. In (A) and (B), signal peptides are expected to be cleaved, but are shown to indicate their presence.

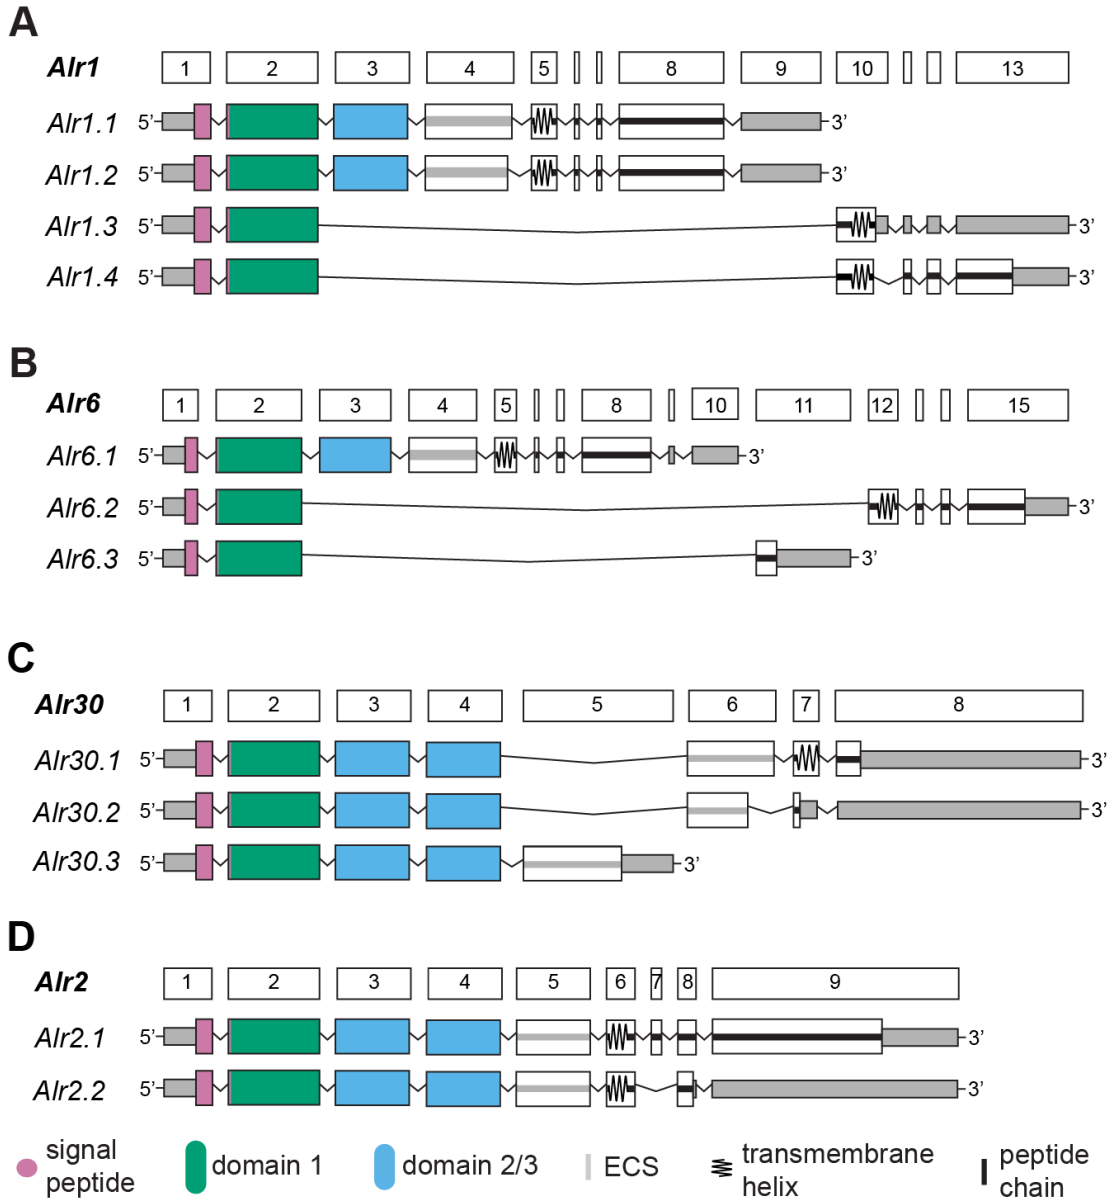

**Fig. S4. Alternative splicing of *Alr* genes**

In all panels, exons are colored according to the type of domain/region they encode. (A) alternative splicing of *Alr1*. (B) Alternative splicing of *Alr6*. (C) Alternative splicing of *Alr30*. (D) Alternative splicing of *Alr2*.

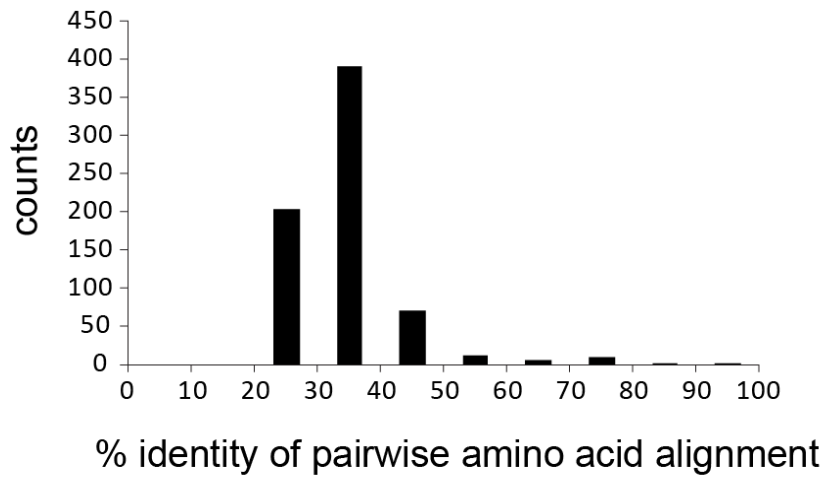

**Fig. S5. Pairwise amino acid identities between *A/r* genes**

Histogram of amino acid percent identities for pairwise alignments of *A/r* genes and putative genes. Alignments were performed using the modified Needleman-Wunsch algorithm available in Jalview.





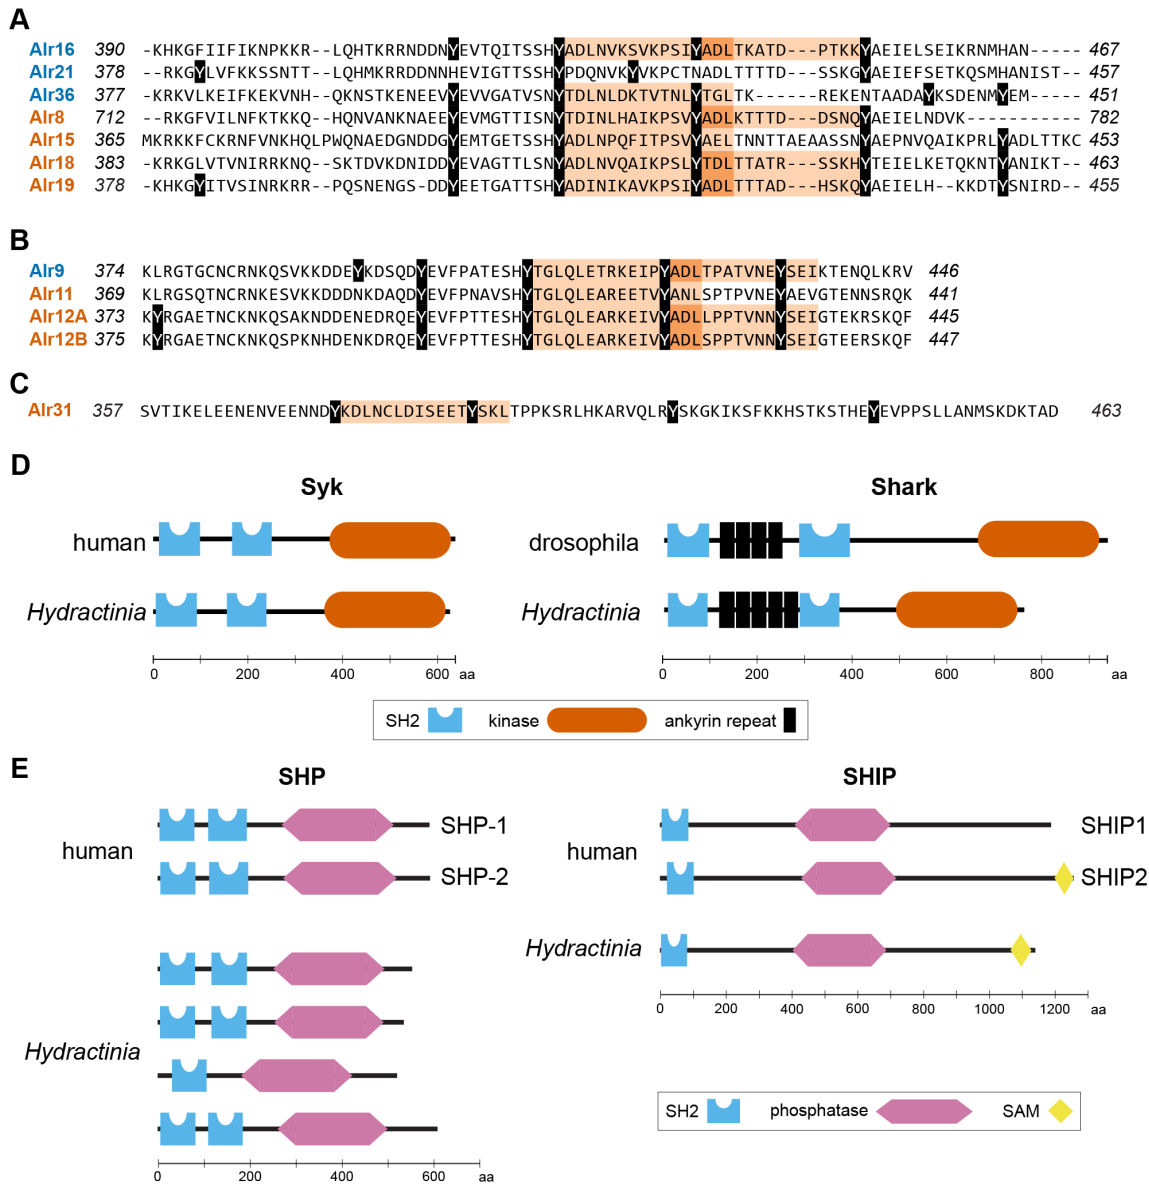

**Figure S7. ITAMs in putative Alr proteins**

- (A) Alignment of group 1 cytoplasmic tails, showing ITAMs (orange shading). Overlapping ITAMs are shown with heavier shading. Bona fide *Alr* genes (blue gene names) are included in the alignment for comparison.
- (B) Alignment of group 2 cytoplasmic tails, showing ITAMs. Shading as in (A).
- (C) ITAM in putative *Alr* gene *Alr31*.
- (D) Comparison of human Syk and *Drosophila* Shark to *Hydractinia* Syk and Shark.
- (E) Comparison of human SHP and SHIP proteins to *Hydractinia* SHP and SHIP homologs.



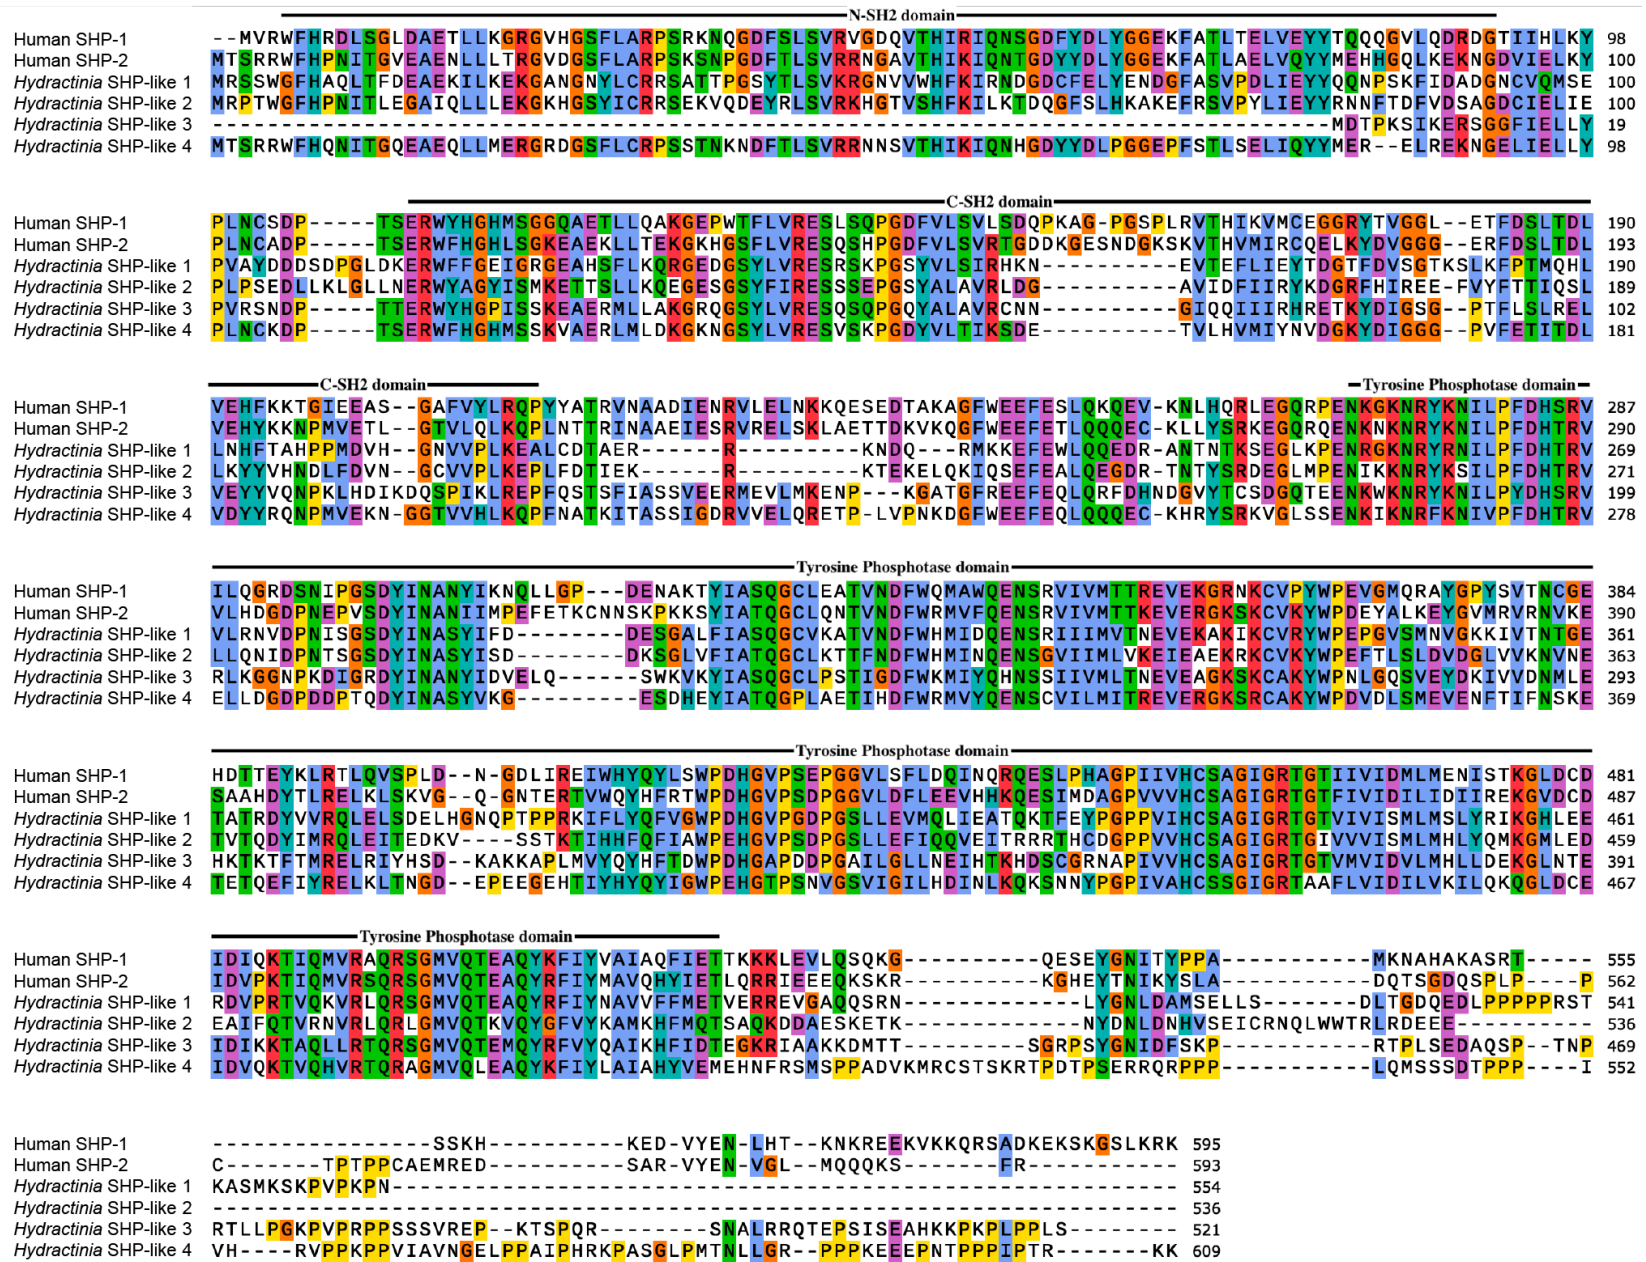

**Figure S9. SHP protein alignment.**  
ClustalO alignment of *Hydractinia* SHP-like proteins with Human SHP-1 (NP\_002822), and SHP-2 (NP\_002825)







Domain 1  
|A-| |A'| |---B---| |---C---| |---C'-| |C''| |---D---| |---E---| |---F---| |---G---|  
LNVKVLPVLTISTTFNATVLELQVTLLEPSEAIAASMTVRELPSTLITLTGAVDGFNVAGGGRKLFGDRVSGIFNRRNNIVTLTIQNIQYNETLTFQLLVGSSSTLKAANISIVEIS  
EEEEETTEEEETTb EEEEEEE TTTT EEEEEETTEEEEEETTEEE HHHHHHTTTEEEEEETTTTEEEETTbTTTT EEEEEETTTTEEEEEEEEEE

Alr2 Domain 1  
|A-| |A'| |---B---| |---C---| |---C'-| |C''| |---D---| |---E---| |---F---| |---G---|  
LSLTPAIEFVVGSRVITYYVDVADVDDVVFNFRINYNDSRIAEGTKVFDHIPPFPFGNRLRTSTPLQNKQSYSLLDNLEYNDTGLFFAKIEFKPNVEANSTTNIILY  
EE TTEEEETTb EEEEEEE TTTT EEEEEETTEEEEEETTTTEETTbTTTT EEEEEETb GGG EEEEEEEETTTTEEEEEEEEEE

Alr3 Domain 1  
|A-| |A'| |---B---| |---C---| |---C'-| |C''| |---D---| |---E---| |---F---| |---G---|  
ALVYDTSPTISGIFNQSAISPKATITANDNRTVKSFYVLPSTQDAIAGSNNVLOALPVPFNSRTASAAQCYLLOVNPDKFSDDYTFRGVLIYILNNDINNPIAVRQDVKLDVYF  
EEETTTTEEEETTb EEEEEEE TTTT EEEEEETTTT EEEEEETTEEEETTbTTTTTEEEEEETTEEEETTbTTTTTEEEEEEEETTTTTEEEEEEEEEE

Alr4 Domain 1  
|A-| |A'| |---B---| |---C---| |---C'-| |C''| |---D---| |---E---| |---F---| |---G---|  
NVEPLNGQSEVTEMLDKDITLQWITFLKGFMLQSHDIYLPNRTKIVSNQPPETVVGKRMYGTRLVVFTADAAVFKLKNVKTFTDSSHNFTLVVAFERKDDFNRRGTGVADINLVNVE  
EEGGG EEEETTEEEEEEE TTTTEEEEEEEETTTTEEEETTTEE HHHHHHTTTEEEEEEGGG EEEEEETTTTTEEEEEEEETTT EEEEEEEEEE

Alr6 Domain 1  
|A-| |A'| |---B---| |---C---| |---C'-| |C''| |---D---| |---E---| |---F---| |---G---|  
GTVAVKTNFEVFNQTAQLQWRVDPAGEQVGFVEVFIGLPNVQIKLTSVITAGKERFGNRLSGSLNGLYTSLSKKIQFNEKSFNPKVVFYKPEFYYPKNSVVIKVV  
EEEEETTEEEETTb EEEEEEE TTTTEEEEEEEETTTTEEEETTTEE HHHHHHTTTEEEEEETTEEEETTbTTTT EEEEEEEETTTTEEEEEEEEEE

Alr7 Domain 1  
|A-| |A'-| |---B---| |---C---| |---C'-| |C''| |---D---| |---E---| |---F---| |---G---|  
ASSGKTVVKNVFERVQIKSTVMEWKIASHDNQTNKVLKLYVLPDRDRVVFSSYGKYOSSQKGRQTFGNRLSATFSKIKGKYTVLTKRIQYNEVYTFQLKVFIPKKSVEETKVADIRIKNVV  
EEEEETTEEEETTb EEEEEEE TTTTEEEEEEEETTTTTEEEETTTEE HHHHHHTTTEEEEEEGGG EEEEEETbTTTT EEEEEEEETTT EEEEEEEEEE

Alr8 Domain 1a  
|A-| |A'| |---B---| |---C---| |---C'-| |C''| |---D---| |---E---| |---F---| |---G---|  
YGGTATAATVTVNFQSTLKEWTAIPSPAEQIVVLKVFIPDTNNVGLTNVNFVILPTGMSLFGNRLSATFINSKYTLMLKNVYNDSCTFQMYAIFRKPAAYSVYQVNRNSNIKVI  
EEEEETTEEEETTb EEEEEEE TTTTEEEEEEEETTTTTEEEETTTEE HHHHHHTTTEEEEEETTEEEETTb GGG EEEEEEEETTTTTEEEEEEEEEE

Alr8 Domain 1b  
|A-| |A'| |---B---| |---C---| |---C'-| |C''| |---D---| |---E---| |---F---| |---G---|  
VNDSTISDTASFLDIYVNTLKLDMMLLSAGEVIVGVQVYVLPDTNTRITIDTSPVLSKGISIFGNRLSATFINSRYRLMLRNIRYNESFTFQLYVIYGLHSSSRFNIQVTMK  
EEEE TTEEEETTb EEEEEEE TTTTEEEEEEEETTTTTEEEETTTEE HHHHHHTTTEEEEEETTEEEETTbTTTT EEEEEEEETTTTEEEEEEEEEE

Alr9 Domain 1  
|A-| |A'| |---B---| |---C---| |---C'-| |C''| |---D---| |---E---| |---F---| |---G---|  
GVEAIIKNIETADNSTAELSWRVE TNKDGFRVGVVLEGGVVIIDKSGIVTEAGRNFVGGRLSATFSNNVYKMFKKIQYNEARSTLTAAPYKWSALDPVNDTATITSVK  
EEEEETTEEEETTb EEEEEEE TTTTEEEEEEEETTTTEEEETTTEE HHHHHHTTTEEEEEETTEEEETTbTTTT EEEEEEEETTTTEEEEEEEEEE

Alr11 Domain 1  
|A-| |A'| |---B---| |---C---| |---C'-| |C''| |---D---| |---E---| |---F---| |---G---|  
GTVAVKTNLELFPNETLNLVYRIVLDVGEIISTANVYVLPSPNVQIKFISTTAAGNAMFGNRLSGSLSKDIYALSKNIQYNEQKSFNPKVIFQSPVLHAKNATVVIKEV  
EEEEETT EETTb EEEEEEE TTTTEEEEEEEETTTTTEEEETTTEE HHHHHHTTTEEEEEETTEEEETTbTTTT EEEEEEEETTTTEEEEEEEEEE

Alr12A Domain 1  
|A-| |B---| |---C---| |---C'-| |C''| |---D---| |---E---| |---F---| |---G---|  
VKTNLVFPVNTAQLQWVVPVAGEQVGFVEVFI GSTNVQIKLTSVITISGKKRFGNRLSGSLNGLYTSLSKKIQFNEKSFNPKVVFYKPEFYYPKNSVVIKEV  
EEEEETTb EEEEEEE TTTTEEEEEEEETTTTTEEEETTTEE HHHHHHTTTEEEEEETTEEEETTbTTTT EEEEEEEETTTTEEEEEEEEEE

Alr12B Domain 1  
|A---| |B---| |---C---| |---C'-| |C''| |---D---| |---E---| |---F---| |---G---|  
VKTNLVFPVNTAQLQWVVDLDGELITTVNVFLESPLVILVGLHLASATPAGKTMFGDRVSGSLNGLYTSLSKKIQFSEKSFNLEVLPHSQPFLKKNATVVIKVG  
EEEEETTb EEEEEEE TTTTEEEEEEEETTTTTEEEETTTEE HHHHHHTTTEEEEEETTEEEETTbTTTT EEEEEEEETTTTEEEEEEEEEE

Alr15 Domain 1  
|A-| |A'| |---B---| |---C---| |---C'-| |C''| |---D---| |---E---| |---F---| |---G---|  
DGQIAVLIANNKKEASGKGDCTVYWNISNAENIFHLKLYRNKTNIKSNPNASWKSLELFTVNTSISIEETFMGDKMCCYMTIHNVSYADDASEYVMQVYIILNPIREKKNATYRLDV  
EEEEETT EETTb EEEEEEEETGGEEEEEEETTEEEEEE GGGTTEEEEEETTEEEEEEEETTEEEETTb GGGTTEEEEEEEETTTTEEEEEEEEEE

Alr16 Domain 1  
|A-| |A'| |---B---| |---C---| |---C'-| |C''| |---D---| |---E---| |---F---| |---G---|  
ADVRLSTSELEATYGNLDMHWKILDTGQFINSEFLSISRPEDSLIFGSANVQNIANKGKELFGNRLSAYVKTTSYRVSLKNIQYNETLSPQLTTLNPLFGKOTTFIEIKDVK  
EEEEETTEEEETTb EEEEEEE TTTTEEEEEEEETTTTTEEEETTTEE HHHHHHTTTEEEEEEGGG EEEEEETbTTTT EEEEEEEETTTTEEEEEEEEEE

Alr17 Domain 1  
|A-| |A'| |---B---| |---C---| |---C'-| |C''| |---D---| |---E---| |---F---| |---G---|  
HVSQVHKVKSLEVTHGSTVNMKFNILLSKNQVITGFSLVVLPDVGNEVVSQVNSQMQEKGRELFNRLSATFNKTAGLYIATGNIQDNETYAFRLMTTFLPDQLEGNILIRNIT  
EEEEETTEEEETTb EEEEEEE TTTTEEEEEEEETTTTTEEEETTTEE HHHHHHTTTEEEEEEGGG EEEEEETbTTTT EEEEEEEETTTTEEEEEEEEEE

Alr18 Domain 1  
|A-| |A'| |---B---| |---C---| |---C'-| |C''| |---D---| |---E---| |---F---| |---G---|  
LNVKVLPVLTISTTFNATVLELQVTLLEPSEAIAASMTVRELPSTLITLTGAVDGFNVAGGGRKLFGDRVSGIFNRRNNIVTLTIQNIQYNETLTFQLLVGSSSTLKAANISIVEIS  
EEEEETTEEEETTb EEEEEEE TTTT EEEEEETTEEEEEETTEEE HHHHHHTTTEEEEEETTTTEEEETTbTTTT EEEEEETTTTEEEEEEEEEE

Alr19 Domain 1  
|A-| |A'| |---B---| |---C---| |---C'-| |C''| |---D---| |---E---| |---F---| |---G---|  
LNVKVLPVLTISTTFNATVLELQVTLLEPSEAIAASMTVRELPSTLITLTGAVDGFNVAGGGRKLFGDRVSGIFNRRNNIVTLTIQNIQYNETLTFQLLVGSSSTLKAANISIVEIS  
EEEEETTEEEETTb EEEEEEE TTTT EEEEEETTEEEEEETTEEE HHHHHHTTTEEEEEETTTTEEEETTbTTTT EEEEEETTTTEEEEEEEEEE

Alr21 Domain 1  
|A-| |A'| |---B---| |---C---| |---C'-| |C''| |---D---| |---E---| |---F---| |---G---|  
AVSEIAMTKCATVNTTKLTKVRLPSEIYIKLHLKLPDENIVTYASQKLTVNIKGRQLFGKRLSANYSKHYEVNVTLTIQNIQYNEVTFYFVARFPGFVLTGATIKCVT  
EEEEETTEEEETTb EEEEEEE TTTTEEEEEEEETTTTTEEEETTTEE HHHHHHTTTEEEEEEGGG EEEEEETbTTTT EEEEEEEETTTTEEEEEEEEEE

Alr23 Domain 1  
|A-| |A'| |---B---| |---C---| |---C'-| |C''| |---D---| |---E---| |---F---| |---G---|  
NGVTFIKSNKIVLNGNTLELEWTVNVSPGDIALRSVYLSDFISPILDGSLVEKGRELFNRLSATFNGTYTMSIMDVRYNESGTFRLVFFHNGLKETKSDIHVRVT  
EEEEETTEEEETTb EEEEEEEETTTTEEEEEEEETTEEEETTTEE HHHHHHTTTEEEEEETTEEEETTbTTTTTEEEEEEEETTTTEEEEEEEEEE

Alr27 Domain 1  
|A-| |A'| |---B---| |---C---| |---C'-| |C''| |---D---| |---E---| |---F---| |---G---|  
QIVSLANNKKEASGKGDIVHWNISNAEKFLLELSNKTNIKSNPNGNWKSLELFTVNTSISIEETFMGDKMCCYMTIHNVSYDADAQSEYVMQVYIILNPIREKKNATYRLDV  
EEEEETT EETTb EEEEEEEETGGEEEEEEETTEEEEEE GGGTTEEEEEETTEEEEEEEETTEEEETTb GGGTTEEEEEEEETTTTEEEEEEEEEE

Alr28 Domain 1  
|A-| |A'| |---B---| |---C---| |---C'-| |C''| |---D---| |---E---| |---F---| |---G---|  
YFKAECAEQNLGKAEKGNVITYWSLVNVTKRTYKATLRFDNLVVSTCNAAGNGFTCVTPKNDKYEASFNKTDKQITLTLNLTYSDSDYLVALDYKHKQTRPERLNTTITQV  
EEEEETTb EEEEEEE TTTT EEEEEETTEEEEEEE TTTTEEE TTTTEEEEEEGGG EEEEEETb GGG EEEEEEEETTTTEEEEEEEEEE

Alr29 Domain 1  
|A-| |A'| |---B---| |---C---| |---C'-| |C''| |---D---| |---E---| |---F---| |---G---|  
IQGAVNKTNIKATYNNRISITFFLSTNPKNIEFSWELIATYQSSFEKVEPNYFKDRSFSSEKSRNFKLHINTQYTDAGIFRFKVLKIPDFASATATLMQK  
EEEEETTEEEETTb EEEEEEE EEEEEETTEEEEEETTTTEEEETTTEE HHHHHHTTTEEEEEETTTTEEEETTbTTTT EEEEEEEETTTTEEEEEEEEEE

Alr30 Domain 1  
|A-| |A'| |---B---| |---C---| |---C'-| |C''| |---D---| |---E---| |---F---| |---G---|  
LSLTPAIEFVVGSRVITYYVDVADNIDAIKFIYNDVQIGEGTKRLEFPPTPPFGVRLRTSTLQNKRYTLLHLDNLYKNDTGLFFAKIEFKPNVEANSTTYLILY  
EE TTEEEETTb EEEEEEE TTT EEEEEETTEEEEEETTEEE TTTGGEEEEETTTTEEEEEETTb GGG EEEEEEEETTTTEEEEEEEEEE

Alr31 Domain 1  
|A-| |B---| |---C---| |---C'-| |C''| |---D---| |---E---| |---F---| |---G---|  
APQVNVV IAGEDLNITYYFNDEKVNWYLNRIADNVLLFKEKYGTVLHNHNTSYGDRLVITFQEVYQALLWNNMTYDTSKIMTFEYSSSPENSSIGHIKTNTFRFPVDVK  
EEETTb EEEEEEE TTTTTEEEEEEEETTEEEEEETT EEE TTTTTEEEEEETTTTEEEETTbTTTTTEEEEEEEEEE TTTT EEEEEEEEEE

Alr33 Domain 1  
|A-| |A'-| |---B---| |---C---| |---C'-| |C''| |---D---| |---E---| |---F---| |---G---|  
LQSINLANITKEITITVHGEELKLSILMLHSQRLLVYKLRRIPIVFKSOLKFLDKKSFENGLTFSESESNVIKYLWAPKLSLNDQRLTIIVAVNNTMPDDVNTNITLNLKIV  
EEEEETTT EEEEEETTb EEEEEEEETTT EEEEEETTEEEEEETTEEEETTbTTTT EEEEEETTEEEEEEEETTb GGG EEEEEEE TTTTEEEEEEEEEE

Alr34 Domain 1  
|A-| |A'| |---B---| |---C---| |---C'-| |C''| |---D---| |---E---| |---F---| |---G---|  
GELIKSQTGVVRESVDISPITDFNGESLLSVKVPGLPDKLNVAVGSSSAFTVAKGGSFGGRQANVPAKGRYTLASTLKYVDEAAEYATATPYEATAEVRVLRKTIIDLKVI  
EEEEETTEEEETTb EEEEEEE TTEEEEEEEETTTTTEEEETTTEE TTTTEEEEEEGGG EEEEEETb GGG EEEEEEEETTT EEEEEEEEEE

Alr35 Domain 1  
|A-| |A'| |---B---| |---C---| |---C'-| |C''| |---D---| |---E---| |---F---| |---G---|  
GTVSANKNNVNDKNSVLSYFICYPPEEKFNVIDIYIKLDPVSSVITILAQGSNLSLQSGSFGGRVSTSVLVSASKYTLTINNAQYDTSASYKAIIVLTKTGEVSVKKNVIALEVN  
EEEEETTEEEETTb EEEEEEE TTTTEEEEEEEETTTT EEEEEETTEEE TTTTEEEEEEGGG EEEEEETb GGG EEEEEEEETTT EEEEEEEEEE

Alr36 Domain 1  
|A-| |A'| |---B---| |---C---| |---C'-| |C''| |---D---| |---E---| |---F---| |---G---|  
GNVTAISNSMTAKLNSTVVLQWKLIFPRMDEIRLYALPNLVEPLKVRFYRRGVEILNASIEMFGNRLSATVNGSLTFLVKNKVYDTSKYLRVVMKYYPFMRLOSTVTLNVT  
EEEEETTEEEETTb EEEEEEEETTT EEEEEETTTTTEEEEGGGTTEEE HHHHHHTTTEEEEEETTEEEETTb GGG EEEEEEEETTTTEEEEEEEEEE

Alr38 Domain 1  
|A-| |A'| |---B---| |---C---| |---C'-| |C''| |---D---| |---E---| |---F---| |---G---|  
AEVRRALNVVQDLILKGEDVEVTLITMLVGQRLLSIKVQLPGNLELATCSERAFLLQNETLRGKIFETKILGKGLYRFGKSLDYDDGTMYLATAIEHDGYTRVHKDDVVRKVNVL  
EEEEETTEEEETTb EEEEEEE TTTTEEEEEEEETTTTEEEETTTEE GGGTTEEEEEEGGG EEEEEETb GGG EEEEEEEEEE EEEEEEEEEE

**Fig. S11. STRIDE secondary structure predictions for Alr domain 1**

For each domain, the top line shows beta-strands labeled according to their position in the primary amino acid sequence. The middle line shows the sequence of the domain. The bottom line shows the STRIDE secondary structure predicted from the Colabfold model. (H = alpha helix, G = 3-10 helix, I = PI-helix, E = beta-strand extended conformation, B = isolated bridge, T = turn.)





**Fig. S12. Multiple sequence alignment of V-set Ig domains and Alr domain 1.**

Alr domain 1 sequences V-set Ig domains from pfam (pf07686). The positions of conserved V-set residues according to the nomenclature of Cannon et al [30] are shown above and below the alignment. Residues are highlighted by sequence conservation and chemical property with CLUSTALX colors as implemented in Jalview.



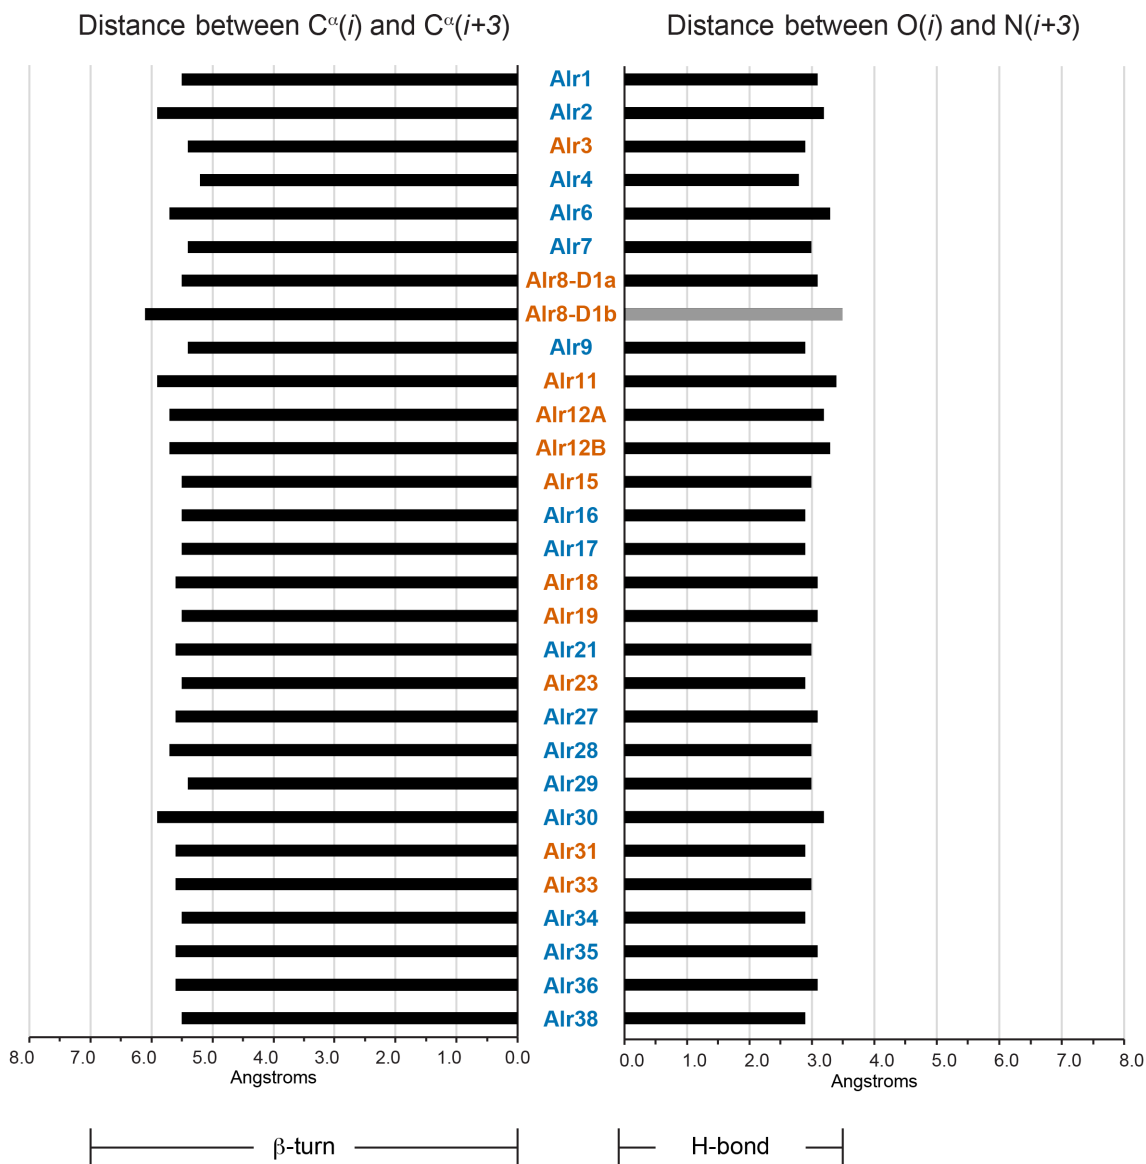

**Fig. S13. Measurements of the turn from strands A' to B in the predicted structures of domain 1.**

Left graph shows distance between the alpha carbons of the first and fourth residues in the turn. In a beta-turn, the distance between these two atoms is less than 7.0 Å. Turns <7.0 Å are shown in black bars. Those >7.0 Å are showing with gray. Right graph shows distance between the oxygen atom of the first residue and the nitrogen atom of the fourth residue. A distance of <3.5 Å is considered small enough for hydrogen bonding to occur. Black bars indicate distances <3.5 Å. Gray bars indicate distances >3.5 Å. Gene names are color-coded according to whether they are *bona fide* (blue) or putative (orange) genes.



Alr1 Domain 2  
|A-| |A'| |---B---| |---C-| |---C'| |---D-| |---E-| |---F---| |---G---|  
GSP RVCGRKLKSNYTVNEGDFRNITQDICGYPKPKVSWTLGQENAGSSTSFAVNNATROYEYHYKTRPFNRSDCGSNIAFIAKNTLGSINGNAWIDV  
EEEEb EEEETTTb EEEEEETTTTTEEEEEETTEEEEE EEEEEEGG EEEEE b GGTTEEEEEEEEEETTEEEEEEEEE

Alr2 Domain 2  
|A-| |A'| |---B---| |---C-| |---D-| |---E-| |---F-| |---G---|  
GGP SLISNLSSFTYVTEENTTNYKIPIILCGHPKPKVTVTEFVGNKNVVRVETIDEKRRKYRYILTIPIITREMNGKVLSEYAVGNVSKITETAKLNVTY  
EEEE TTEEEETTEEEEEEEEEETTTTTEEEETTTTTEEEEEEGG EEEEEEEEE GGTTEEEEEEEEEETTEEEEEEEEE

Alr2 Domain 3  
A |A'| |---B---| |---C-| C' |---D-| |---E-| |---F---| |---G---|  
SPF CDTAVKVIETEEVASAMFTTHVCGNPMPTVSMEEGGOSVAVHTHTAEKDKYKYTANLTSYLKPSRCGRRELIATAENSI GEKTSKVVLKYK  
EETT EEEETTT EEEEEETTT EEEEEETTEE EEEEEETTEEEEE GGG GGTTEEEEEEEEEETTEEEEEEEEE

Alr3 Domain 2  
|A-| |A'| |---B---| |---C-| C' |---D-| |---E-| |---F-| |---G-|  
GGP HVCGDDLPSNITINATFSVVLSEIHLGGRQKPLVTVSINDETIVTTHNSNTTENTADAQYVYSVVI PKVSASMCCKTLKYIATGYESDKIGTALLDTQ  
EEEEb TTEEEETTT EEEEEEEEEETTT EEEEEETTEE EEEEE TTTTEEEEEEEEEETTT GGTTEEEEEEEEEETTTTEEEEEEEEE

Alr4 Domain 2  
A |A'| |---B---| |---C-| C' |---D-| |---E-| |---F---| |---G---|  
GGP KICGDNITAITREEGSMLEVAIQDVC GKPTPLVTVKFASEKNFKNSTSSGLINKEIQLYRYTYMHQNLRSRQCEPIIFKAISRLGSVSGRAMVNV  
EE EEEETTTb EEEEEEEEEETTT EEEEEETTT EETTEEEEEEGG EEEEE b GGTTEEEEEEEEEETTEEEEEEEEE

Alr6 Domain 2  
A |A'| |---B---| |---C-| C' |---D-| |---E-| |---F-| |---G-|  
GGP LFCGANISKSYNVTEGAALTLKQDVC GNPKPNVQWKNSSDSAYMPTKSSVLIENITRITYQYTFITKALTRTNCGHIIEFRASGHKPDITGQTMINI  
EE TTEEEETTTTEEEEEEEEEETTT EEEEEETTT EE EEEEEETTTTEEEEEEEEE GGTTEEEEEEEEE EEEEEEEEE

Alr7 Domain 2  
A |A'| |---B---| |---C-| |---C'| |---D-| |---E-| |---F-| |---G-|  
GGP DVCGKGMESLYTAKEGQSLISIVQDICGHPKPKVQWKNKDMFVSLKSTLINDTIKQFRYSYGRSLRRSDCGKYITFNASNDVAIEQNAMIDV  
EE TTEEEETTTTEEEEEEEEEETTTTTEEEEEETTEEEEE EEEEEETTTTEEEEEEEEE GGTTEEEEEEEEEETTEEEEEEEEE

Alr8 Domain 2a  
A |A'| |---B---| |---C-| |---D-| |---E-| |---F-| |---G-|  
GGP RYCGKGLASKIILAEKESLTIQDICGHPKPKDFKWKFKGDKIWRILLCSTILDATKQYRHEFKTRPLTRADCGKTIIFNASNELGSLAGETSVDV  
EE TTEEEETTTTEEEEEEEEEETTTTTEEEEEETTT TTTTEEEEEEGG EEEEEEEEE GGTTEEEEEEEEEETTEEEEEEEEE

Alr8 Domain 2b  
A |A'| |---B---| |---C-| |---C'| |---D-| |---E-| |---F-| |---G-|  
GTP KICGVRKLSNYTVVENSTIITFDQVCAHPKPKVAEWKIDQEKLYKKSNTSLINTEQRKYRFTYQTRKLRNDCGAKFILKATNAMGSVEETVKVDV  
EE TTEEEETTTb EEEEEETTT EEEEEETTEEEEE EEEEEEGG EEEEE b GGTTEEEEEEEEEETTEEEEEEEEE

Alr9 Domain 2  
|A'| |---B---| |---C-| |---E-| |---F-| |---G-|  
GGPDQCIGISLNSYTVHEGKQLSLLSEICGNPKPLTLWKLQNELGYSYSSDFMLMDIFSMRYRYVYKTRRLVTREDCGKTLAFNATGASGTIQGYAILDV  
TTT B TTEEEETTTTEEEEEEEEEETTT EEEEEETTB BTB TTTTEEEEEEEEE GGTTEEEEEEEEEETTEEEEEEEEE

Alr11 Domain 2  
|A-| |A'| |---B---| |---C-| C' |---D-| |---E-| |---F-| |---G-|  
GGP DVCGISLKS SYIVNEGKKLSEFSEVCGNPKPLTLWKMENELEYSSADIRYMKSTMRYQYVYKTRSHITRKCCKTIIIFNATGANKMITGEAVISV  
EEEEb TTEEEETTTb EEEEEETTT EEEEEETTT EETTEEEEEEGG EEEEE b GGTTEEEEEEEEEETTEEEEEEEEE

Alr12A Domain 2  
A |A'| |---B---| |---C-| C' |---D-| |---E-| |---F-| |---G-|  
GGP EACGITLNTSYAVNEGKQLSVTTEVCGNPKPLVLTWQIQEELEYSYSTEVAAPVNISIMRYRYVYKTRRLVTREDCGKTLVFNATGANMIKEETLIDV  
EE TTEEEETTTTEEEEEEEEEETTT EEEEEETTEE EEEEEEEEEETTEEEEEEEEE GGTTEEEEEEEEEETTEEEEEEEEE

Alr12B Domain 2  
|A'| |---B---| |---C-| |---C'| |---D-| |---E-| |---F-| |---G-|  
GGPEACGITLNTSYAVNEGKQLSVTTEVCGNPKPLVLTWQIQEELEYSYSTEVAAPVNISIMRYRYVYKTRRLVTREDCGKTLVFNATGANMIKGETLIDV  
TTT B TTEEEETTTTEEEEEEEEEETTT EEEEEETTEEE EEEEEEEEEETTEEEEEEEEE GGTTEEEEEEEEEETTEEEEEEEEE

Alr15 Domain 2  
|A| |A'| |---B---| |---C-| C' |---D-| |---E-| |---F-| |---G-|  
GGP EFCGMKLPNDVNVNNEKAEVEICGHPKPEVNFYIDEGKRLP GACKLTDERLKYKCEVELTDLNCGEMLYLEGRGYDTMKLTSSSLIAN  
EEEb TTEEEGGG EEEEEEEEEETTEEEEEETTEE EEEEEEGG EEEEE GGTTEEEEEEEEE TTTTEEEEEEEEE

Alr16 Domain 2  
A |A'| |---B---| |---C-| C' |---D-| |---E-| |---F-| |---G-|  
GSP RICGKSLKSYV TASDTAVLTVTQDICGHPKPKFVKWKIERDNTFSISFSSVLMNSTRKYRYSFATRNIIIRSDCGEKIMFNARNKFGNENGSLTI  
EE EEE TTTTEEEEEEEEEETTTTTEEEEEETTT EEE EEEEEETTTTEEEEEEEEE GGTTEEEEEEEEEETTEEEEEEEEE

Alr18 Domain 2  
|A-| |A'| |---B---| |---C-| |---D-| |---E-| |---F-| |---G-|  
GSP RFCGPKVEFSYSVTEGSLITLQDICGNPKPKDVKWKVGEDIFTSSSSSVINATRKYEYFTTRPLNRNDCGINITVFASNTLYGFERNIMVHVE  
EEEEb TTEEEETTTTEEEEEEEEEETTTTTEEEEEETTB EEEEEEGG EEEEEEEEE GGTTEEEEEEEEEETTEEEEEEEEE

Alr19 Domain 2  
A |A'| |---B---| |---C-| C' |---D-| |---E-| |---F-| |---G-|  
GSP SICGRNLES LYTVNQDNILNVVQFICGYPNPEVKKVGDNDNFKSYSLSEINAMROYKYTFTRPI TRNDCGOTLIFVANN TVGSIQRNAELDVE  
EE TTEEEETTTTEEEEEEEEEETTTTTEEEEEETTT EE EEEEEEGG EEEEEEEEE GGTTEEEEEEEEEETTEEEEEEEEE

Alr21 Domain 2  
A |A'| |---B---| |---C-| |---D-| |---E-| |---F-| |---G-|  
GPP NVCGKSVKSRYYITDTATITVAQDICGHPKPKFVEWKLIEDTSFSSSSRFMLIDATKRYRYSFTTENIVRSNCGKKIMYHARNEFGNVEGYSMIYIS  
EE TTEEEETTTTEEEEEEEEEETTTTTEEEEEETTT EEEEEEEEEEGG EEEEEEEEE GGTTEEEEEEEEEETTEEEEEEEEE

Alr23 Domain 2  
|A-| |A'| |---B---| |---C-| C' |---D-| |---E-| |---F-| |---G-|  
GSS LFCDISSKYHHTVNESVLTVVQNVCGYPIPELKKVGDNDNFKSYSLSEINAMROYKYTFTRPI TRNDCGOTLIFVANN TVGSIQRNAELDVE  
EEEEETTT EEEETTTTEEEEEEEEEETTTTTEEEEEETTT EE EEEEGG EEEEEEEEE GGTTEEEEEEEEEETTEEEEEEEEE

Alr27 Domain 2  
|A| |A'| |---B---| |---C-| C' |---D-| |---E-| |---F-| |---G-|  
GVP EFCGKTLKPNELINLINKNAEVEICGHPKPEVNFYIHESKRLP GACELTEGRKLYKCKVELTDLKCGEKLNLRKGYQNMKLTSSSLIAN  
EEEEb TTEEEGGGTEEEEEEEEEETTTTTEEEEEETTEE EEEEEETTTTEEEEEEEEEETTTTTEEEEEEEEE GGG EEEEEEEEE

Alr28 Domain 2  
|A-| |A'| |---B---| |---C-| |---D-| |---E-| |---F-| |---G-|  
GGP DICSNFMTSYEFQAQHYQPIVNITICGYPTPRFSWAGQNTKPKDISIRSIKAHKHVFSAVLSNLTSSMCGSKLTFKASNKFGKVVSTSAVINVS  
EEEE TTEEEETTTb EEEEEETTTTTEEEEEETTTB EEEEEETTTTEEEEEETTTb GGTTEEEEEEEEEETTEEEEEEEEE

Alr29 Domain 2  
A |A'| |---B---| |---C-| C' |---D-| |---E-| |---F-| |---G-|  
GGP DICGKQLPLQISFRNTSSRIISTNVCGNPPPQIFWSMDGMLQSTRKERDQSRKFEYSVNLTFGDLCDKELSYKIVGALSENITLVGSIKIT  
EE TTEE EEEEEETTTT EEEEEETTEE EEEEEEGG EEEEEETTT TTEEEEEEEEEETTT EEEEE

Alr30 Domain 2  
|A-| |A'| |---B---| |---C-| |---D-| |---E-| |---F-| |---G-|  
GGP SLISNLSSFTYVTEENTTNYNVPILCGHPKPKVTVTEFVGNKNVVRVETIDEKRRKYRYILTIPIITREMNGKVLSEYAVGNVSKITETAKLNVTY  
EEEE TTEEEETTTTEEEEEEEEEETTTT EEEEEETTTTTEEEEEEEEEETTEEEEEEEEE GGTTEEEEEEEEEETTTTEEEEEEEEE

Alr30 Domain 3  
A |A'| |---B---| |---C-| C' |---D-| |---E-| |---F-| |---G-|  
SPF CDTAVIEVIEAEVASAVFTTHVCGNPMPTVSMEEGGOSVAVHTHTAEKDKYKYTANLTPYLLPSRCGRKLIITAKNKGEGTRRIVLKYK  
EE TTTT EEEETTT EEEEEETTT EEEEEETTEE EEEEEETTEEEEE GGTGGGTTEEEEEEEEEETTEEEEEEEEE

Alr31 Domain 2  
A |A'| |---B---| |---C-| C' |---D-| |---E-| |---F-| |---G-|  
GGP SICGALPSPVTVYKSRDQITLSVFLCGHPKPKVVIWKNDRFLINGTVKEIDEETELFKYTLDFKNYLQPKCSVKVSLMARHSEEEQVQFQSEIQY  
EE TTEEEETTTTTEEEEEEEEEETTT EEEEEETTEE EEEEEETTTTEEEEEEEEE GGG TTTT EEEEEEEEE EEEEEEEEE

Alr33 Domain 2  
A |---B-| |---C-| C' |---D-| |---E-| |---F-| |---G-|  
GGP FV CNKERKIVIRTNP LRVKDIICSNPKPEVTVWYDNLISGGDVLKQLTKYSVRKIFTTQDVS LCGKRISYVATGRNGISLNRSTLIVFP  
EETTT TTEEEEEEEEEETTT EEEEEETTEE EEEEEETTEEEEEEEEE GGGGGTTEEEEEEEEEETTTTEEEEEEEEE

Alr34 Domain 2  
|A-| |A'| |---B---| |---C-| C' |---D-| |---E-| |---F-| |---G-|  
GGP DDCGERLSPITLVEEEQASVFVAFLCGNPKPKTVHWITGRQIISVVDNTPSTGMKYKSTNIKITLETCEETVRYVAAGYGRELTSSTVIKVS  
EEEEb TTEEEETTTTEEEEEEEEEETTT EEEEEETTEE EEEEEETTT EEEEEEEEE GGTTEEEEEEEEEETTEEEEEEEEE

Alr35 Domain 2  
A |A'| |---B---| |---C-| C' |---D-| |---E-| |---F-| |---G-|  
GGP EICNLKPPETLTVISHERPVRVSVCGNPEPQITWELGNLKSTIKGKKPKKFI FETILPQITPPNCGSRLTYKATCGHGRVSDRITLNVK  
EETTT TTEEEETTTb EEEEEETTTTTEEEEEETTEE EEEEE TTEEEEEEEEE b GGTTEEEEEEEEEETTEEEEEEEEE

Alr36 Domain 2  
|A-| |A'| |---B---| |---C-| |---D-| |---E-| |---F-| |---G-|  
GGP DDCGDSLKSMYNVVEFEKLVTKEICGHPKPKTVRWKIQNRNFYSPASSQLINSTRLYRYSFEWRNITRANCGRKLFLFSAGYGESLSENAWLN  
EEEEb TTEEEETTTb EEEEEEEEEETTTTTEEEEEETTT TTEEEEEETTTTEEEEEEEEE b GGTTEEEEEEEEEETTEEEEEEEEE

Alr37 Domain 2  
|---A-| |---B-| |---C-| |---C'| |---D-| |---E-| |---F-| |---G-|  
IFEKPYRCGHRTLQOISSSFOVKETICGQRIPSLWYLDGKLIENGAREIEKHKYVFTKTFKDMTACGRNLSVIVITSFQDGYTATYYATISFN  
EEEEEEEEEEEEETTEEEEEEEEEETTT EEEEEETTEEEEE EEEEEETTEEEEEEEEE TTTTTEEEEEEEEEETTT EEEEE

Alr38 Domain 2  
|A-| |A'| |---B---| |---C-| C' |---D-| |---E-| |---F-| |---G-|  
GGP QICGSLTPAVIMKRNITTVRFSSVVCGNRPPSMSWMLGCESLKTVTKGLKPKQEVVHVDLKIITTRMCGLLLRVVASGHDGEITGSKLIEK  
EEEEb TTEEEETTTTEEEEEEEEEETTT EEEEEETTEE EEEE TTEEEEEEEEEETTTTTEEEEEEEEEETTEEEEEEEEE



**Fig. S14. STRIDE secondary structure predictions for Alr domains 2 and 3**

For each domain, the top line shows beta-strands labeled according to their position in the primary amino acid sequence. The middle line shows the sequence of the domain. The bottom line shows the STRIDE secondary structure predicted from the Colabfold model. (H = alpha helix, G = 3-10 helix, I = PI-helix, E = beta-strand extended conformation, B = isolated bridge, T = turn.)

Figure S9 – I-set alignment

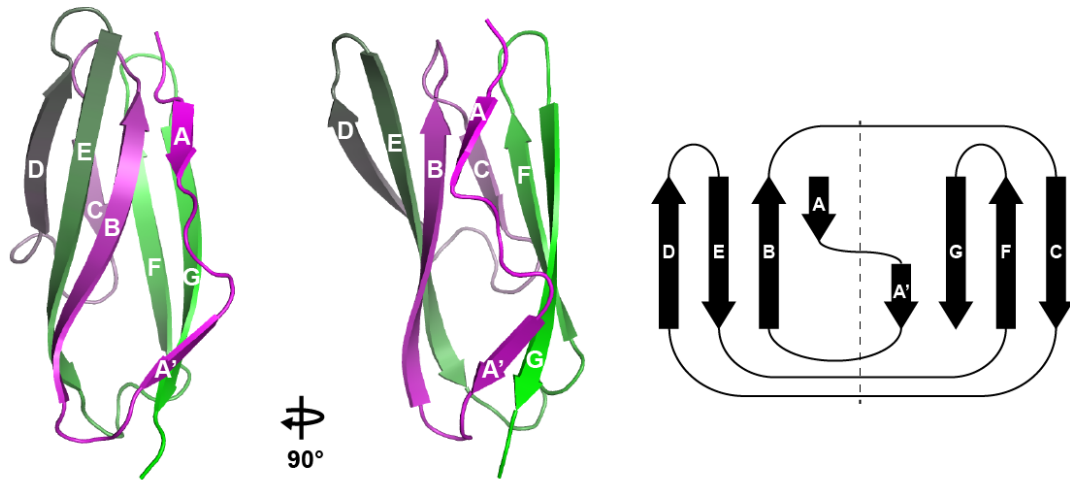

**Fig S15. Predicted structure of Alr2 domain 2.**

$\beta$ -strands labeled on the predicted structure of Alr2 domain 2. The corresponding Greek key is shown to the right.



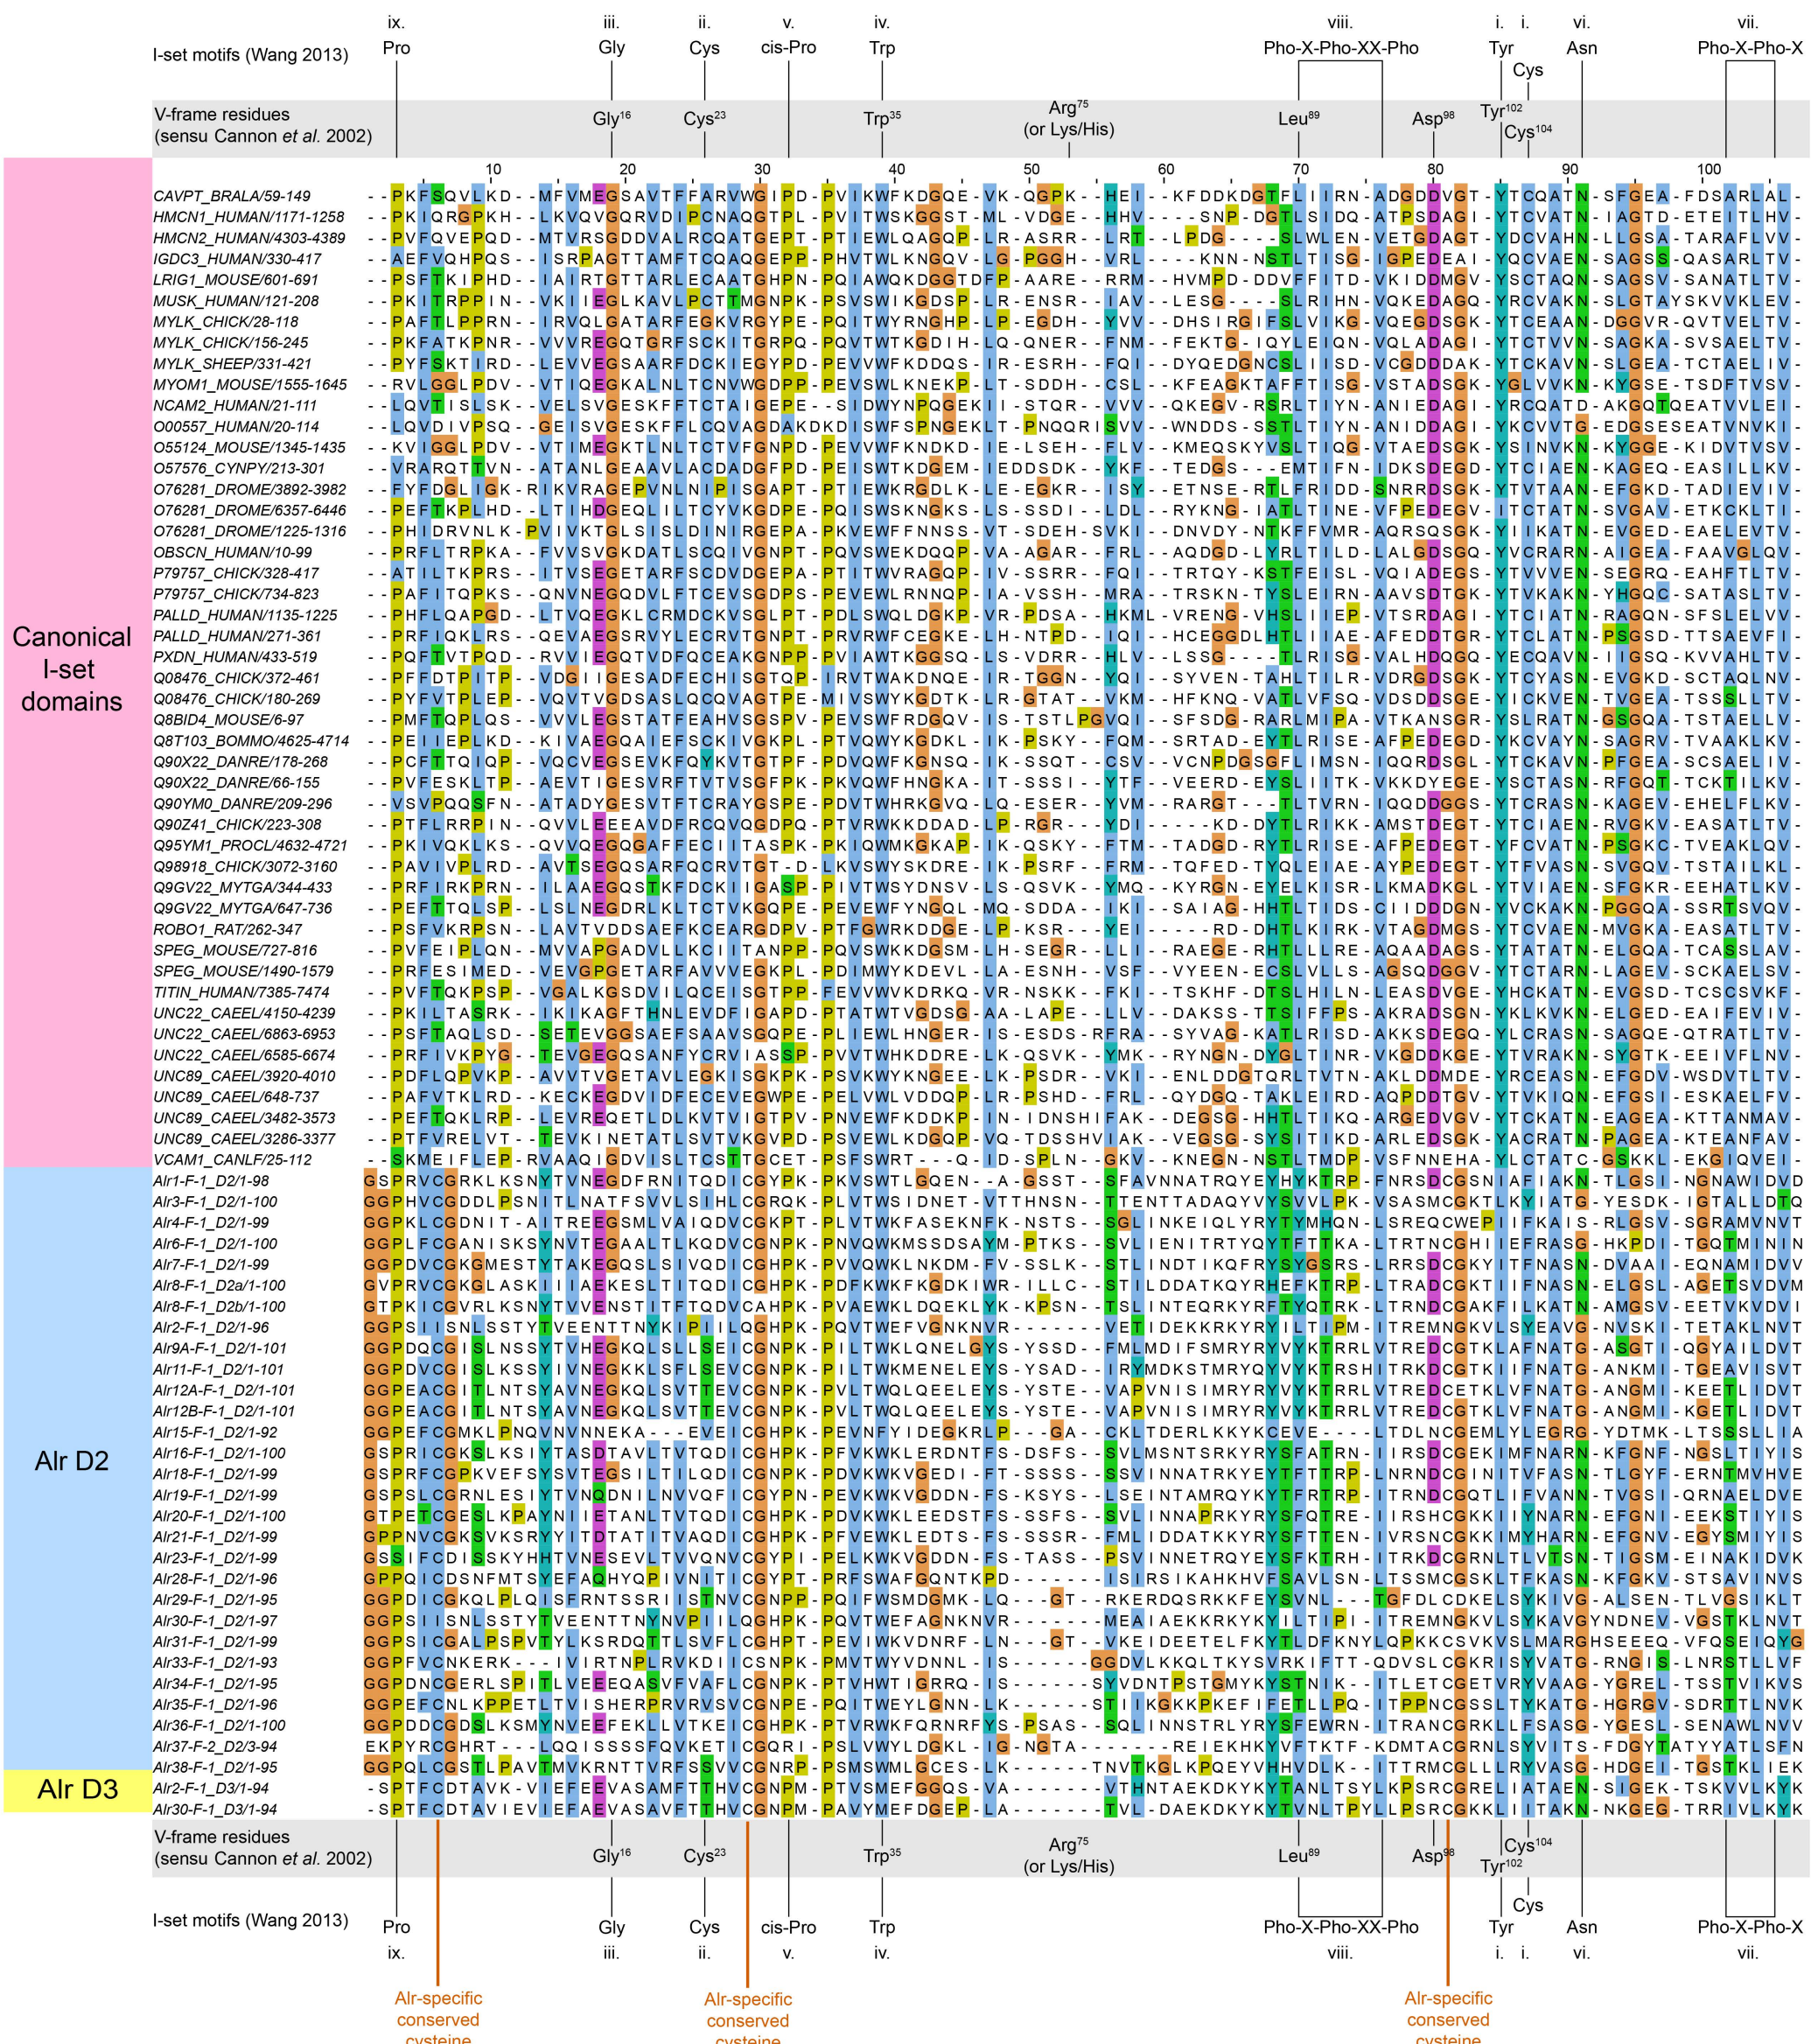



**Fig. S16. Multiple sequence alignment of I-set Ig domains and Alr domains 2 and 3.**

Alr domain 2 and 3 sequences were aligned to I-set Ig domains from pfam. Residues in the alignment are highlighted by sequence conservation and chemical property with CLUSTALX colors as implemented in Jalview. The positions of conserved V-frame residues are shown above and below the alignment with gray background. Motifs common to I-set domains are also indicated. The position of invariant cysteine residues is shown in red lettering. Note that domain 3 is the most membrane-proximal Ig domain in Alr2 and Alr30, hence the conserved cysteine appears there and not in domain 2.

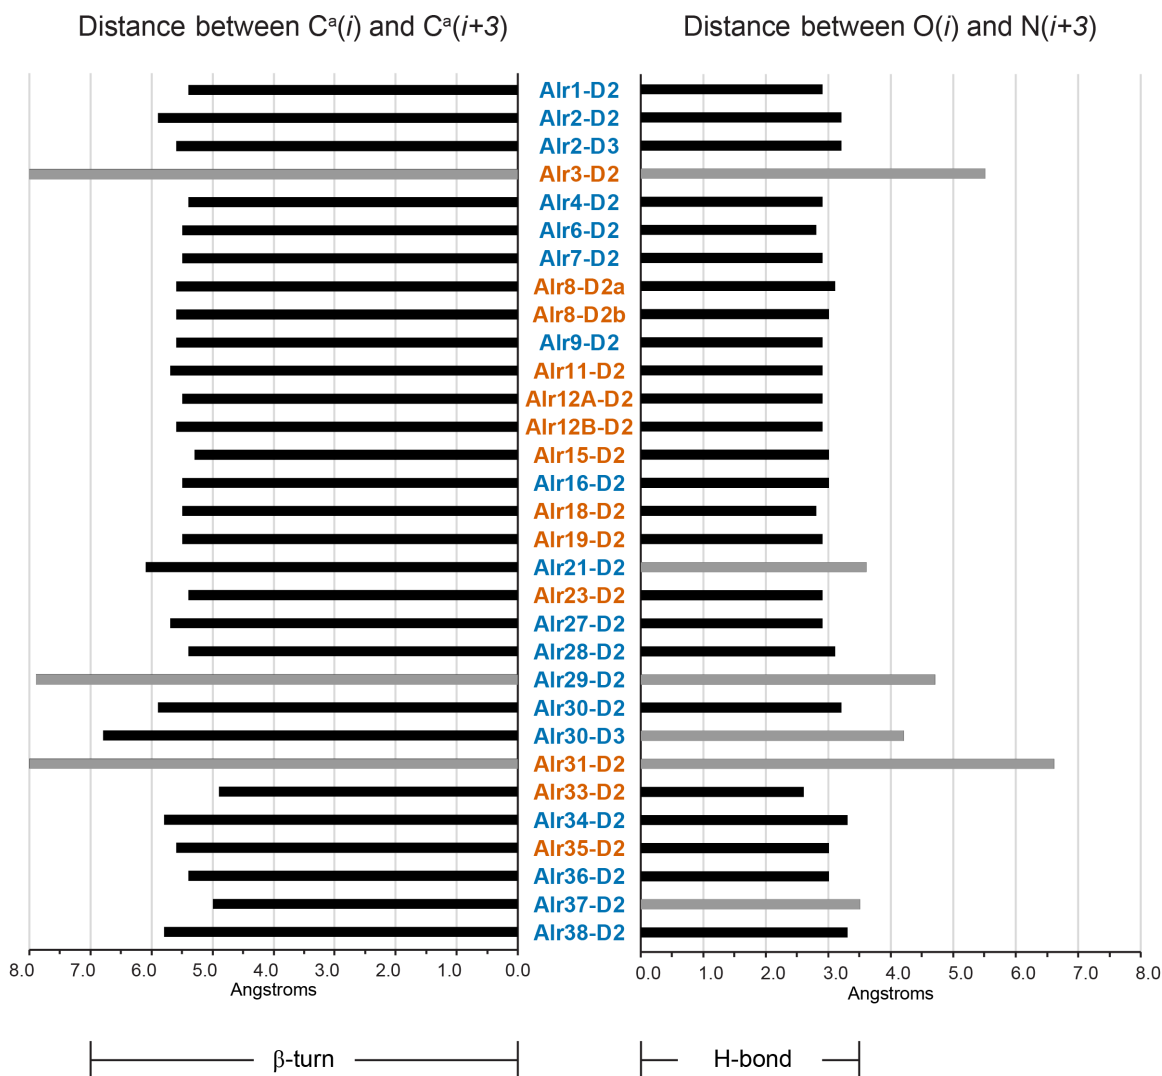

**Fig. S17. Measurements of the turn from strands A' to B in the predicted structures of domains 2 and 3.**

Left graph shows distance between the alpha carbons of the first and fourth residues in the turn. In a beta-turn, the distance between these two atoms is less than 7.0 Å. Turns <7.0 Å are shown in black bars. Those >7.0 Å are showing with gray. Right graph shows distance between the oxygen atom of the first residue and the nitrogen atom of the fourth residue. A distance of <3.5 Å is considered small enough for hydrogen bonding to occur. Black bars indicate distances <3.5 Å. Gray bars indicate distances >3.5 Å. Gene names are color-coded according to whether they are *bona fide* (blue) or putative (orange) genes.

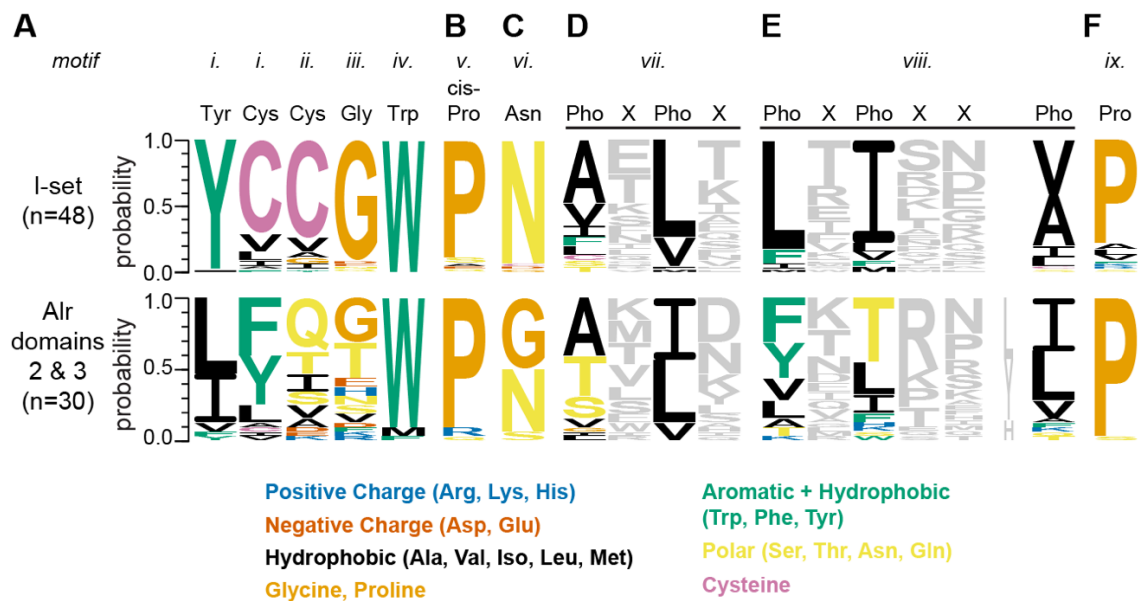

**Fig. S18. Sequence logo of I-set-specific motifs in classical I-set domains and Alr domains 2 and 3.**

Sequences of Alr domains 2 and 3 and I-set domains from the pfam I-set sequence profile (pf07679) were aligned in MAFFT. Sequence logos for then created to represent the motifs identified by Wang (2013) for the Alr or pfam sequences.

(A) Motifs *i*, *ii*, *iii*, and *iv*, which are discussed in the main text because they are also part of the V-frame as described by Cannon et al (2002).

(B) Motif *v* is a conserved proline in the BC loop, and motif *vi* is a conserved asparagine in the FG loop. These two residues form a hydrogen bond that stabilizes the BC and FG loops in a closed position. In domains 2 and 3, we found the conserved proline residue in 28/31 sequences but the asparagine was only present in 13/31 sequences (see also Figure S9). Thus, motif *v* is present in domains 2 and 3, but motif *vi* and the structural motif it forms with motif *v* do not appear to be a common feature of these domains.

(C) Motif *vii* is a Pho-X-Pho-X pattern of amino acids (where Pho represents a hydrophobic residue), located approximately 10-12 residues downstream of motif *vi*. It is found in beta-strand G and denotes the C-terminal end of an I-set (and also V-set) domain. This pattern was found in 30/31 of domain 2 and 3 sequences (See also Figure S9).

(D) Motif *viii* is a set of hydrophobic and hydrophilic residues, Pho-X-Pho-X-X-Pho, located at the bottom of beta-strand E. The last two hydrophobic residues typically contact the tyrosine in the tyrosine corner, while the two consecutive hydrophilic residues between them form a beta bulge. In our alignments, 26/31 domain 2 and 3 sequences had this motif, although the first and second hydrophobic residues often had polar or aromatic side chains (see also Figure S9). As noted above, the tyrosine corner is not present in domains 2 and 3. However, a beta bulge was predicted to occur at the end of the E strand in 28/31 structural models. Motif *viii* is therefore present in most



domains, but the structural consequences of this motif are likely to differ from traditional I-set domains.

(E) Motif *viii* is a proline ~23-26 residues upstream of the B-strand cysteine. This proline defines the beginning of an I-set domain and, in domains 2-3, it was found in 30/31 sequences (see also Figure S9).







**Fig. S19. Amino acid sequence removed from the ECS prior to structure prediction.**

Alr1 ECS-trimmed  
|--A--| |--B--| |--C--| |C'| |-E-| |--F--| |---G---|  
FVPSGV **SIVSIYNNNTN** **CINVTWN** KQETGSCNI **KYHLRL**NGKAT **IYNTLD** **RHFTF** CISMKFA **ENVTVWAS** **YKGNKGMVSS** SD  
EEEEEEETTTEEEEEEE TTTT EEEEEETT EEEE EEEEE EEEEEETTTEEEEEEE

Alr2 ECS-trimmed  
|--A--| |--B--| |---C---| |--C'--| |-E-| |--F--| |---G---|  
FTPGKV **ONLSSRR**DK **CIITWK** NVDTGNCE **VWYTVKYYG**GE **ELLHEQNT**SSGKV **GASFC**NSDKVPKVN **ITRIVAVS**NDTFKQ **EGEEIIVT**V  
TEEEEEETTTEEEEEEE TTTT EEEEEEEETTTEEEEEETT TTTT EEEEETTTGGG EEEEEEE TTTT EEEEEEE

Alr3 ECS-trimmed  
|--A--| |--B--| |--C--| |--C'--| |-E-| |--F--| |---G---|  
FKPPAV **VITQSYKDLL** **CVRTWTD** PIDIGLCTG **YIEVNLMN**SSD **KTVHSAV**INDTTV **DFTYC**YNTSSGFINVT **YVRVRALY**GR **QEGMW** **SQRNV**  
EEEEEEETTTEEEEEEE TTTT EEEEEEEETTTEEEEEETT TTTT EEEEE GGG EEEEEETTTEE EEEE

Alr4 ECS-trimmed  
|--A--| |--B--| |--C--| |C'| |-E-| |--F--| |G-|  
FVPAKV **MGNFYER**DN **CTYVTK**RERTGNCRV **MYLQFG**NGA **KVNT**LG **MYKRC**NDAVLMQVD **SVTIWGRY**GLKQGER **FTLVK**  
EEEEEEETTTEEEEEEE TTTT EEEEEETT EEEE EEEEETTGGGG EEEEEETTTEE EEEE

Alr6 ECS-trimmed  
|--A--| |--B--| |--C--| |C'-| |-E-| |--F--| |---G---|  
FKPAVA **PSIAYYHC**DN **CVHVNWK** TDDTGNCKV **PYQLTENTGN** **TFEVT**GD **TFKNCS**QEILRTT **SVNIRGIY**NN **ORGDKSE**DV **F**  
EEEEEEETTTEEEEEEE TTTT EEEEEETT EEEEE EEEE GGTTT EEEEEETTTEEEEEEE

Alr7 ECS-trimmed  
|--A--| |--B--| |--C--| |C'| |-E-| |--F--| |G-|  
FKPSPV **SINSMYRINES** **CVYMGWL** GESAENCSV **KYYFOF**DGEHSR **HEI**SAM **NFVHC**GLQNR **SVVFWAS**YKNIIGK **TNAL**L  
EEEEEEETTTEEEEEEE TTTT EEEEEETT EEE TTEEEEE TTT EEEEEETTTEE EEEE

Alr8 ECSa-trimmed  
|--A--| |--B--| |--C--| |C'| |-E-| |--F--| |---G---|  
FTPSTV **SIKSLYST**SLN **CIHATWT**REDTGNCRV **NYHLQF**NSRN **DIYST**SKS **YFTIC**NLRSRPA **FDTIWASY**KG **LLGKKS**SSST  
EEEEEEETTTEEEEEEE TTTT EEEEEETTTEEEEE EEEEE TTT EEEEEETTTEEEEEEE

Alr8 ECSb-trimmed  
|--A--| |--B--| |--C--| |C'| |-E-| |--F--| |---G---|  
FKPPAV **FIKISRHNAS** **CVKILWQ**REKMGNCIL **SYQLQF**DGNSE **IFPT**SNT **YFTMC**TQLNIT **SVGIWATH**KG **EIGDI**TVDR **I**  
EEEEEEETTTEEEEEEE TTTT EEEEEETT EEEE EEEEE TTT EEEEEETTTEE EEEE

Alr9 ECS-trimmed  
|--A--| |--B--| |--C--| |C'| |-E-| |--F--| |---G---|  
FSPRKI **RKVI**FKEND **CINGTWT**SEGTGNCLP **PYHIHFN**KENN **IFNT**SDT **HYAVC**NISNV **SVVIWAS**YRKY **GORTKVN** **I**  
TEEEEEETTTEEEEEEE TTTT EEEEEETT EEEE EEEEE TTT EEEEEETTTEE EEEE

Alr11 ECS-trimmed  
|--A--| |--B--| |--C--| |C'| |-E-| |--F--| |---G---|  
FSPQRI **RKV**FKYKDN **CINGTWT**SEATGNCAL **NYHLQF**AERSD **ILNT**SDT **HYAVC**NIFNV **SVVIWAS**YKNI **GQKAKVN** **I**  
TEEEEEETTTEEEEEEE TTTT EEEEEETT EEEE EEEETT EEEEEETTTEE EEEE

Alr12A ECS-trimmed  
|--A--| |--B--| |--C--| |C'| |-E-| |--F--| |---G---|  
FSPQKI **QNAIF**YKDN **CINGIWT**REATGNCLV **NYHLQF**EGGRY **IFNT**THT **YYAVC**NVLNAS **YVFNWAS**YKNI **GEKIKINA**  
TEEEEEETTTEEEEEEE TTTT EEEEEETT EEEE EEEEETTTT EEEEEETTTEE EEEE

Alr12B ECS-trimmed  
|--A--| |--B--| |--C--| |C'| |-E-| |--F--| |---G---|  
FSPQKI **QNAV**YKDN **CINGIWT**CEATGNCLV **NYHLQF**EGGRY **IFYS**THT **YYAVC**NVLNAS **YVFIWAS**YKNI **GEKIKINA**  
TEEEEEETTTEEEEEEE TTTT EEEEEETT EEEE EEEEE TTT EEEEEETTTEE EEEE

Alr15 ECS-trimmed  
|--A--| |--B--| |---C---| |--C'---| |-E-| |---F---| |G-|  
YT **PQNSYKAD**SNG **CYTLTWSI**HHLGKIC **VKMYELKALFDES** **LLKNTTILT**TLN **NNFM**CYPS **ILYVKVRTVS**IWNAKSNW **VMQHI**  
EEEEEEETTTEEEEEETT TGGGEEEEEEEEEEETTTEEEEEEE EEEE TTEEEEEEEEEETT B EEEE

Alr16 ECS-trimmed  
|--A--| |--B--| |--C--| |C'| |-E-| |--F--| |---G---|  
FKPSKI **PLTTSYR**YNAS **CVYLTWH**KEDTGNCLL **PYHLKF**DDKDD **VYST**FNT **NFNLC**HSSCAA **SASVWASY**KG **NAGYKNSIN**L  
EEEEEEETTTEEEEEEE TTTT EEEEEETT EEEE EEEEETTTT EEEEEETTTEEEEEEE

Alr18 ECS-trimmed  
|--A--| |--B--| |--C--| |C'| |-E-| |--F--| |---G---|  
FNPSLVPGI **SLYRYNTS** **CINVI**WNRENTGNCRV **NYHLQF**NNGA **IYNT**SNR **YFIFC**SPLQVD **TVVLWSSY**KG **KMGK**VAST **F**  
EEEEETTTEEEEE TTTT EEEEEETT EEEE EEEEE EEEEEETTTEE EEEE

Alr19 ECS-trimmed  
|--A--| |--B--| |--C--| |C'| |-E-| |--F--| |---G---|  
FVPSMV **SMVSLYR**HNAS **CVRVTD**AEDTGRGNV **SYHLQF**TGRET **IYNS**SNR **YFTL**CNSSD **TVIIWASY**KG **RNGWKLAS** **I**  
EEEEEEETTTEEEEEEE TTTT EEEEEETT EEEE EEEETT TTT EEEEEETTTEEEEEEE

Alr21 ECS-trimmed  
|--A--| |--B--| |--C--| |C'| |-E-| |--F--| |---G---|  
FTPSKV **RITSSYR**HNAS **CVYLNWY**REDTGNCLL **EYHIQF**NNIND **VYNT**SKT **NVDI**CHSPAS **SASIWASY**KG **ISGGKVDI**L  
EEEEEEETTTEEEEEEE TTTT EEEEEETT EEEE EEEE TTT EEEEEETTTEEEEEEE

Alr23 ECS-trimmed  
|--A--| |--B--| |--C--| |C'| |-E-| |--F--| |---G---|  
FVPSPV **SMISLSS**YNGT **CVRVTD**AEDTGKCI **LNHYHVWFS**GREI **IYNT**SNT **YFTLC**NATDVK **NVTIWASY**NRD **VKGNFTTTS**SPDI  
EEEEEEETTTEEEEEEE TTTT EEEEEETT EEEE EEEETT TTT EEEEEETTTEEEEEEE

Alr27 ECS-trimmed  
|--A--| |--B--| |---C---| |--C'---| |-E-| |---F---| |G-|  
YT **PIDLK**FEKKS **IDCYNLSWSV**HPLAKPC **VKEYQLVVNO**ID **KAPLNTT**TKTS **NYLIC**SKS **IQSCKVRTLC**RSNQESDW **VTAA** **I**  
EEEEEEETTTEEEEEEE GGGGEEEEEEEEEEETTTEEEEEEE EEEETTTEEEEEEEEEETT B EEEE

Alr28 ECS-trimmed  
|--A--| |--B--| |--C--| |C'-| |-E-| |---F---| |G|  
FSPSKV **PDFS**FAIKDN **COIQFWS**TLNSGRGCV **PYEQIL**DNKRR **ILSQST**QPFAN **FLSE**CYAEYTHNNV **SAGIRAIYDNK**YGNW **SSV**KP  
TEEEEEETTTEEEEEEE TTTT EEEEEETT EEEEEETT EEEE TTTT TTTTEEEEEETTTEE EEE

Alr30p1 ECS-trimmed  
|--A--| |--B--| |--C--| |C'-| |-E-| |--F--| |---G---|  
LTPESV **KVNSTEK**RDG **CMYTWE**KVNTGECAL **VSYRIDYF**DSRGL **VLFSONK**SEGIY **TASM**CD **EIIIS**KVN **NLRIIAIP**NSIFKVHG **NGTIVK** **I**  
EEEEEEETTTEEEEEEE TTTT EEEEEEEETT EEEEEETT EEEE HHHH EEEEEEE TTT EEEEE

Alr30p3 ECS-trimmed  
|--A--| |--B--| |--C--| |C'-| |-E-| |--F--|  
LSPVQIN **STMRKVGS** **CIDTNW**SAPNTGEC **VSYKVDYLD**SNV **VHSKVFHNKEL** **KTES**CD **TKVVSNTL**SVRVTVV **SNDTRVEPTNESI**  
EE EEEEEETTTEEEEEEE TTTT EEEEEEEETT EEEEEEE EEEE HHHHH EEEEEEE

Alr31 ECS-trimmed  
|--A--| |--B--| |--C--| |C'-| |-E-| |--F--| |---G---|  
AI **ISIKSL**RRKMD **CIFTEWTE**KHVDKCS **IYYEVEYR**DRRND **VWRENT**TTN **EAIFC**SNVSAS **KVNSVWIRGV**FLNEQNVY **GDWYIHAL**  
EEEEEEETTTEEEEEEE TTTT EEEEEEEETT EEEEE EEEETT TTTGGG EEEEEEE TTTTEE EEEE

Alr33 ECS-trimmed  
|--A--| |--B--| |--C--| |--C'---| |-E-| |---F---| |---G---|  
FKPDQV **QILSSVVK**GR **CVKTNWK**LLNTGKCNV **PYIYK**VNSEN **KAIHHA**SVGEN **SYEY**C **MENILDVKH**PTVY **MRAAF**GD **IRGLWNNLR**M  
EEEEEEETTTEEEEEEE TTTT EEEEEEEETTTEEEEEEEETT EEEETTTHHHHHHEEEEEEEETTTEE EEEE

Alr34 ECS-trimmed  
|--A--| |--B--| |---C---| |C'-| |-E-| |---F---| |---G---|  
SLPKPV **ENFKYYP**MGGN **CFKFTWL**AQNTGLCK **HPFELQLL**KNNK **VKRO**SIS **PM**TTG **TFIHC**EVD **SASLKKIYKAKIRSIYQD**GAT **TRLEGRW** **SLLE**L  
TEEEEEETTTEEEEEEE TTTT EEEEEEEETT EEEEEETT EEEETTTHHHHHHEEEEEEEETTTEE EEEE

Alr35 ECS-trimmed  
|--A--| |--B--| |--C--| |C'-| |-E-| |--F--| |---G---|  
FTPENV **KVTEAYL**KQ **CVTVRFT**TLDVGTCK **LSYEFNYF**DDRAC **LVGSSAA**DKNTN **TVQQC**GITAS **TVKARARS**SD **SVGQW** **SAYH** **I**  
EEEEEEETTTEEEEEEE TTTT EEEEEEEETT EEEEEETT EEEE EEEEEETTTEE EEEE

Alr36 ECS-trimmed  
|--A--| |--B--| |--C--| |C'| |-E-| |--F--| |---G---|  
FTPSNPN **ATFY**YNS **CVYGTW**NEENTGSC **LNHYIQY**DDNDA **IHLT**TKT **EYTRC**GLTNLK **FVQMWAA**YNGRVGRK **SVYS** **I**  
EEEEETTTEEEEEEE TTTT EEEEEETT EEEE EEEEE TTT EEEEEETTTEE EEEE

Alr37 ECS-trimmed  
|--A--| |--B--| |--C--| |--C'---| |-E-| |--F--| |---G---|  
WTPPVVR **FSVN**VKEN **CIFLW**KQPR **TGLCAV** **SYSVTLY**GENDV **LVYTHFN**L **SOVKE** **SFKYCS**QLLRTINDIK **TVGLQAVY**KDN **NGKVNRRH** **V**  
EEEEETTTEEEEEEE TTTT EEEEEEE GGG EEEEEEEETT EEEEE GGG EEEEEETTTEE EEEE

Alr38 ECS-trimmed  
|--A--| |--B--| |--C--| |--C'---| |-E-| |---F---| |---G---|  
SIPQKI **ENFOY**AIDT **CFVLSWS**RQYTGNCIV **NHEIQYIT**GKN **PTM**NIDIVT **SNTN** **KLSYC**APLPEDIK **IKVIKIRSIY**ER **RG**EW **SSVN** **I**  
TEEEEEETTTEEEEEEE TTTT EEEEEEEETTTEEEEEEEETT EEEETT TTTGGGGGEEEEEEEEETTTEE EEEE

**Fig. S20. STRIDE secondary structure predictions for Alr domains 2 and 3**

For each domain, the top line shows beta-strands labeled according to their position in the primary amino acid sequence. The middle line shows the sequence of the domain. The bottom line shows the STRIDE secondary structure predicted from the Colabfold model. (H = alpha helix, G = 3-10 helix, I = PI-helix, E = beta-strand extended conformation, B = isolated bridge, T = turn.)







**Fig. S21. Multiple sequence alignment of Fn3 domains and the Alr ECS fold.**

Alr ECS sequences were aligned to Fn3 domains from pfam. Residues in the alignment are highlighted by sequence conservation and chemical property with CLUSTALX colors as implemented in Jalview. The positions of residues typically conserved across Fn3 domains are shown above and below the alignment. The position of invariant cysteine residues is shown in red-orange lettering.

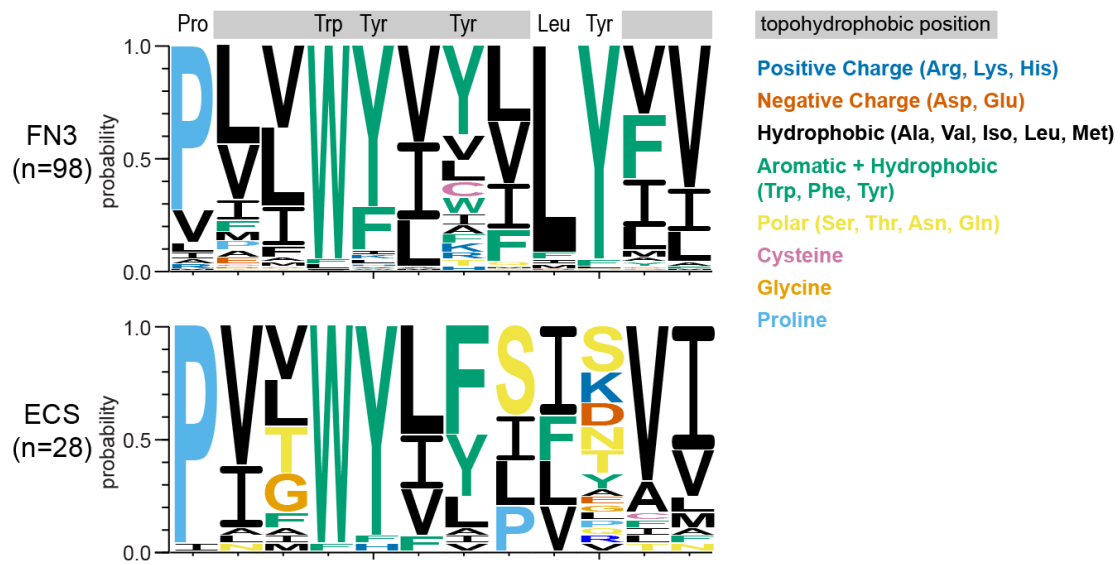

**Fig. S22.** Sequence logo showing residues at conserved positions within Fn3 domains (top) and the ECS fold (bottom).



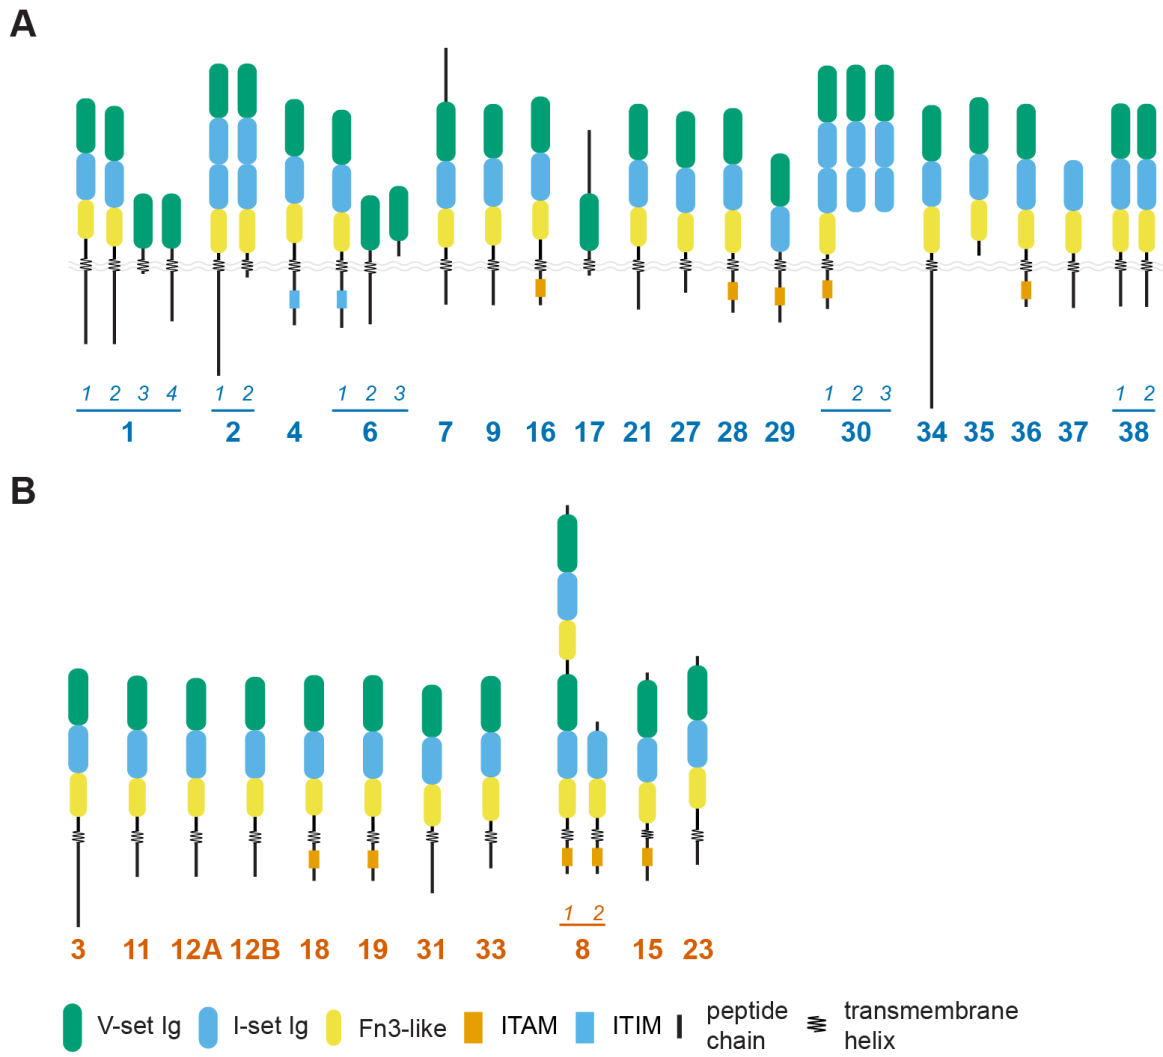

**Fig. S23. Predicted domains and motifs in *bona fide* and putative *Alr* gene products.**

(A) *Bona fide* Alr proteins

(B) Putative Alr proteins

**Table S1. Overlap coordinates of genomic contigs and BAC contigs used to create reference ARC-F sequence.**

| Genome Assembly                 |           |           | BAC contigs              |         |           |
|---------------------------------|-----------|-----------|--------------------------|---------|-----------|
| ID (length)                     | start     | stop      | ID (length)              | start   | stop      |
| utg0000000001<br>(5,049,836 bp) | 687,083   | 1         | bc194<br>(1,225,536 bp)  | 1       | 684,144   |
| utg0000000021<br>(2,644,760 bp) | 174       | 442,144   | bc194<br>(1,225,536 bp)  | 783,992 | 1,225,536 |
| utg0000000021<br>(2,644,760 bp) | 1,005,148 | 1,590,913 | bc18<br>(586,384 bp)     | 1       | 586,384   |
| utg0000000121<br>(601,649 bp)   | 386,059   | 170,371   | bc28<br>(214,692 bp)     | 1       | 214,692   |
| utg0000000688<br>(716,359 bp)   | 88,750    | 244       | bc050N15<br>(147,919 bp) | 1       | 88,530    |
| utg0000000026<br>(2,721,327 bp) | 2,719,577 | 2,666,436 | bc050N15<br>(147,919 bp) | 94,782  | 147,919   |
| utg0000000026<br>(2,721,327 bp) | 2,661,684 | 2,138,742 | bc174<br>(522,055 bp)    | 1       | 522,055   |
| utg0000000026<br>(2,721,327 bp) | 1,818,447 | 1,610,954 | bc29<br>(207,512 bp)     | 1       | 207,512   |

**Table S2. Gene models classified as *Alr* pseudogenes**

| Gene model name | Expression | Reason for classifying as a pseudogene                                                                         |
|-----------------|------------|----------------------------------------------------------------------------------------------------------------|
| Alr2p2.1        | yes        | Partial duplication of exons 1-4 of Alr2. Frame-shift in exon 3 leading to premature stop codons in exon 3.    |
| Alr2p2.2        | yes        | Partial duplication of exons 1-5 of Alr2. Frame-shift in exon 3 leading to premature stop codons in exon 3.    |
| Alr05p          | yes        | No evidence of splicing between exons 2-3.                                                                     |
| Alr10           | yes        | Improper splicing of exon 4 to downstream exons introduces stop codon in transcript.                           |
| Alr12C          | no         | Stop codon in exon 2.                                                                                          |
| Alr13           | no         | Stop codon in exon 1.                                                                                          |
| Alr14p          | no         | No evidence of expression or exon encoding signal peptide.                                                     |
| Alr20p          | Yes        | No evidence of expression or splicing between exons 1 and 2.<br>No evidence of exon encoding a signal peptide. |
| Alr22p          | no         | No evidence of expression or exon encoding signal peptide.                                                     |
| Alr24p          | yes        | A few reads map to exons 2-3. No evidence of exon encoding a signal peptide.                                   |
| Alr25p          | yes        | A few reads map to exons 2-5. No evidence of exon encoding a signal peptide.                                   |
| Alr26p          | yes        | No open reading frame. No evidence of exon encoding a signal peptide. No splicing between exon 2-3.            |
| Alr32p          | no         | Only three exons, which have sequence similarity to Alr31, but are not expressed.                              |

**Table S3. Sequence homology of Domain 1**

| Protein <sup>a</sup> | Domain           | HMMER search of pfam |                    |                             | HHpred search of SCOPe |                        |                                 |
|----------------------|------------------|----------------------|--------------------|-----------------------------|------------------------|------------------------|---------------------------------|
|                      |                  | <i>Accession</i>     | <i>description</i> | <i>e-value</i> <sup>b</sup> | <i>Accession</i>       | <i>SCOPe Family</i>    | <i>probability</i> <sup>c</sup> |
| Alr1                 | D1               |                      |                    |                             | d5l21b                 | b.1.1.1: V set domains | 96.4                            |
| Alr2                 | D1               | PF07686.17           | V-set              | 0.0012                      | d5e56a                 | b.1.1.1: V set domains | 95.8                            |
| Alr3                 | D1               |                      |                    |                             |                        |                        |                                 |
| Alr4                 | D1               |                      |                    |                             | d5my6b1                | b.1.1.1: V set domains | 96.5                            |
| Alr6                 | D1               |                      |                    |                             | d5my6b1                | b.1.1.1: V set domains | 96.5                            |
| Alr7                 | D1               |                      |                    |                             | d5l21b                 | b.1.1.1: V set domains | 96.0                            |
| Alr8                 | D1a <sup>d</sup> |                      |                    |                             | d5my6b1                | b.1.1.1: V set domains | 95.7                            |
| Alr8                 | D1b <sup>e</sup> |                      |                    |                             | d2esve1                | b.1.1.1: V set domains | 96.0                            |
| Alr9                 | D1               |                      |                    |                             | d5my6b1                | b.1.1.1: V set domains | 96.1                            |
| Alr11                | D1               |                      |                    |                             | d5my6b1                | b.1.1.1: V set domains | 96.7                            |
| Alr12A               | D1               |                      |                    |                             | d4n8pa1                | b.1.1.1: V set domains | 96.6                            |
| Alr12B               | D1               |                      |                    |                             | d5my6b1                | b.1.1.1: V set domains | 96.9                            |
| Alr15                | D1               |                      |                    |                             |                        |                        |                                 |
| Alr16                | D1               |                      |                    |                             | d5my6b1                | b.1.1.1: V set domains | 96.9                            |
| Alr17                | D1               |                      |                    |                             | d5my6b1                | b.1.1.1: V set domains | 97.1                            |
| Alr18                | D1               |                      |                    |                             | d5my6b1                | b.1.1.1: V set domains | 97.0                            |
| Alr19                | D1               |                      |                    |                             | d5my6b1                | b.1.1.1: V set domains | 96.4                            |
| Alr21                | D1               | PF07686.17           | V-set              | 0.0012                      | d5my6b1                | b.1.1.1: V set domains | 96.8                            |
| Alr23                | D1               |                      |                    |                             | d5my6b1                | b.1.1.1: V set domains | 96.9                            |
| Alr27                | D1               |                      |                    |                             |                        |                        |                                 |
| Alr28                | D1               | PF07686.17           | V-set              | 1.40E-04                    | d5o04f1                | b.1.1.1: V set domains | 95.3                            |
| Alr29                | D1               | PF07686.17           | V-set              | 8.10E-05                    | d1yjdc1                | b.1.1.1: V set domains | 95.5                            |
| Alr30                | D1               | PF07686.17           | V-set              | 0.0031                      | d5e56a                 | b.1.1.1: V set domains | 95.0                            |
| Alr31                | D1               | PF17711.1            | DUF5556            | 0.0097                      |                        |                        |                                 |
| Alr33                | D1               |                      |                    |                             |                        |                        |                                 |
| Alr34                | D1               |                      |                    |                             | d1c5db1                | b.1.1.1: V set domains | 88.8                            |
| Alr35                | D1               | PF07686.17           | V-set              | 1.00E-04                    | d5o04f1                | b.1.1.1: V set domains | 93.9                            |
| Alr36                | D1               |                      |                    |                             | d5my6b1                | b.1.1.1: V set domains | 93.4                            |
| Alr38                | D1               |                      |                    |                             | d5my6b1                | b.1.1.1: V set domains | 69.5                            |

<sup>a</sup> proteins encoded by *bona fide* genes in blue, putative genes in red

<sup>b</sup> significance cutoff = 0.01

<sup>c</sup> probability of homology; values <50% not shown; values >95% shaded in green

<sup>d</sup> this is the membrane-distal domain with homology to other domain 1 sequences

<sup>e</sup> this is the membrane-proximal domain with homology to other domain 1 sequences

**Table S4. Predicted structural homology for domain 1**

| Protein <sup>a</sup> | Domain           | Colabfold<br><i>plDDT</i><br>score <sup>b</sup> | DALI Top Structural Alignment |                             |             |             | Domain<br>Type <sup>d</sup> | PDBeFold                |                             |             |             |                             |
|----------------------|------------------|-------------------------------------------------|-------------------------------|-----------------------------|-------------|-------------|-----------------------------|-------------------------|-----------------------------|-------------|-------------|-----------------------------|
|                      |                  |                                                 | <i>PDB</i><br>accession       | <i>Z-score</i> <sup>c</sup> | <i>RMSD</i> | <i>% ID</i> |                             | <i>PDB</i><br>accession | <i>Q-score</i> <sup>e</sup> | <i>RMSD</i> | <i>% ID</i> | Domain<br>Type <sup>d</sup> |
| Alr1                 | D1               | 97.4                                            | <a href="#">7kqyE</a>         | 15.2                        | 1.9         | 10          | V-set                       | <a href="#">5uoE</a>    | 0.6356                      | 1.589       | 9.9         | V-set                       |
| Alr2                 | D1               | 90.5                                            | <a href="#">3oaiA</a>         | 15.1                        | 2.1         | 20          | V-set                       | <a href="#">3m45C</a>   | 0.6243                      | 1.663       | 14.7        | V-set                       |
| Alr3                 | D1               | 95.2                                            | <a href="#">3udwD</a>         | 14.8                        | 1.9         | 14          | V-set                       | <a href="#">3udwD</a>   | 0.6095                      | 1.565       | 14.6        | V-set                       |
| Alr4                 | D1               | 92.7                                            | <a href="#">5imkA</a>         | 14.4                        | 1.8         | 16          | V-set                       | <a href="#">2iceT</a>   | 0.6337                      | 1.708       | 16.5        | V-set                       |
| Alr6                 | D1               | 97.0                                            | <a href="#">6o3bE</a>         | 15.7                        | 1.5         | 14          | V-set                       | <a href="#">5immA</a>   | 0.6647                      | 1.695       | 13.6        | V-set                       |
| Alr7                 | D1               | 92.5                                            | <a href="#">2iceS</a>         | 14.9                        | 2.1         | 11          | V-set                       | <a href="#">1neuA</a>   | 0.554                       | 1.923       | 15.1        | V-set                       |
| Alr8                 | D1a <sup>f</sup> | 94.7                                            | <a href="#">2iceT</a>         | 15.2                        | 2.1         | 13          | V-set                       | <a href="#">5immA</a>   | 0.6055                      | 1.874       | 13.5        | V-set                       |
| Alr8                 | D1b <sup>g</sup> | 89.3                                            | <a href="#">5imkA</a>         | 13.5                        | 2.1         | 11          | V-set                       | <a href="#">5immA</a>   | 0.5658                      | 1.875       | 12.3        | V-set                       |
| Alr9                 | D1               | 96.9                                            | <a href="#">6o3bE</a>         | 14.7                        | 1.5         | 11          | V-set                       | <a href="#">6krzG</a>   | 0.6162                      | 1.581       | 13.3        | V-set                       |
| Alr11                | D1               | 96.7                                            | <a href="#">6o3bE</a>         | 15.7                        | 1.6         | 14          | V-set                       | <a href="#">2iceS</a>   | 0.663                       | 1.634       | 16.7        | V-set                       |
| Alr12A               | D1               | 95.4                                            | <a href="#">5imkA</a>         | 14.7                        | 1.8         | 15          | V-set                       | <a href="#">2pndA</a>   | 0.6482                      | 1.708       | 15.1        | V-set                       |
| Alr12B               | D1               | 92.8                                            | <a href="#">5imkA</a>         | 14.9                        | 2           | 16          | V-set                       | <a href="#">2iceT</a>   | 0.6412                      | 1.748       | 15.9        | V-set                       |
| Alr15                | D1               | 85.6                                            | <a href="#">6bj2D</a>         | 14                          | 2.1         | 15          | V-set                       | <a href="#">1u3hE</a>   | 0.5279                      | 1.952       | 14.0        | V-set                       |
| Alr16                | D1               | 95.7                                            | <a href="#">2iceT</a>         | 14.6                        | 2.1         | 10          | V-set                       | <a href="#">2iceT</a>   | 0.6332                      | 1.802       | 10.9        | V-set                       |
| Alr17                | D1               | 95.5                                            | <a href="#">2iceS</a>         | 15                          | 2.1         | 11          | V-set                       | <a href="#">2iceT</a>   | 0.6197                      | 1.879       | 11.7        | V-set                       |
| Alr18                | D1               | 95.7                                            | <a href="#">3qi9D</a>         | 14.9                        | 1.8         | 10          | V-set                       | <a href="#">6oppL</a>   | 0.612                       | 1.515       | 16.2        | V-set                       |
| Alr19                | D1               | 97.3                                            | <a href="#">1tvdB</a>         | 15.3                        | 2.2         | 9           | V-set                       | <a href="#">5uoE</a>    | 0.6353                      | 1.59        | 9.9         | V-set                       |
| Alr21                | D1               | 95.0                                            | <a href="#">6j8gC</a>         | 14.4                        | 2           | 13          | V-set                       | <a href="#">6j8hC</a>   | 0.6408                      | 1.795       | 11.7        | V-set                       |
| Alr23                | D1               | 95.9                                            | <a href="#">2pndA</a>         | 15.3                        | 1.7         | 11          | V-set                       | <a href="#">5immA</a>   | 0.6338                      | 1.668       | 12.2        | V-set                       |
| Alr27                | D1               | 84.2                                            | <a href="#">2f53D</a>         | 14.1                        | 2           | 9           | V-set                       | <a href="#">1u3hE</a>   | 0.5468                      | 1.754       | 11.2        | V-set                       |
| Alr28                | D1               | 80.6                                            | <a href="#">5m2wB</a>         | 14                          | 2.1         | 9           | V-set                       | <a href="#">3ucrA</a>   | 0.5733                      | 1.817       | 19.2        | V-set                       |
| Alr29                | D1               | 88.7                                            | <a href="#">2iceT</a>         | 17.1                        | 1.6         | 10          | V-set                       | <a href="#">2iceT</a>   | 0.7063                      | 1.569       | 11.0        | V-set                       |
| Alr30                | D1               | 92.8                                            | <a href="#">3oaiA</a>         | 15.8                        | 2           | 19          | V-set                       | <a href="#">6ol7L</a>   | 0.6295                      | 1.419       | 19.4        | V-set                       |
| Alr31                | D1               | 86.7                                            | <a href="#">2iceT</a>         | 14.2                        | 2           | 13          | V-set                       | <a href="#">2ptvA</a>   | 0.6401                      | 1.586       | 11.8        | V-set                       |
| Alr33                | D1               | 84.3                                            | <a href="#">6dleB</a>         | 12.6                        | 1.6         | 11          | Ig domain                   | <a href="#">6arqA</a>   | 0.5361                      | 1.811       | 13.4        | V-set                       |
| Alr34                | D1               | 95.7                                            | <a href="#">5imkA</a>         | 15                          | 2.4         | 20          | V-set                       | <a href="#">6vi4C</a>   | 0.6021                      | 2.113       | 20.5        | V-set                       |
| Alr35                | D1               | 93.5                                            | <a href="#">1tvdA</a>         | 16.7                        | 2.2         | 15          | V-set                       | <a href="#">3b9kA</a>   | 0.639                       | 1.771       | 12.7        | V-set                       |
| Alr36                | D1               | 92.9                                            | <a href="#">6fr6B</a>         | 15.3                        | 1.9         | 13          | V-set                       | <a href="#">3udwA</a>   | 0.6006                      | 1.884       | 14.9        | V-set                       |
| Alr38                | D1               | 93.4                                            | <a href="#">5imlA</a>         | 15.8                        | 2.2         | 16          | V-set                       | <a href="#">2iccA</a>   | 0.6086                      | 1.944       | 16.1        | V-set                       |

<sup>a</sup> *bona fide* genes in blue, putative genes in red<sup>b</sup> predicted local-distance difference test score; >90 considered highly accurate<sup>c</sup> Z-score between 8-20 indicates probable homology between query and hit<sup>d</sup> as annotated in the PDB (rcsb.org)<sup>e</sup> Q-score = 1 are identical alignments; >0.5 are considered to have homologous structures<sup>f</sup> this is the membrane-distal domain with homology to other domain 1 sequences in Alr8<sup>g</sup> this is the membrane-proximal domain with homology to other domain 1 sequences in Alr8

**Table S5. Sequence homology for Domain 2 and 3**

| Protein <sup>a</sup> | Domain           | HMMER search of pfam |                    |                             | HHpred search of SCOPe |                        |                                 |
|----------------------|------------------|----------------------|--------------------|-----------------------------|------------------------|------------------------|---------------------------------|
|                      |                  | <i>Accession</i>     | <i>description</i> | <i>e-value</i> <sup>b</sup> | <i>Accession</i>       | <i>SCOPe family</i>    | <i>probability</i> <sup>c</sup> |
| Alr1                 | D2               | PF07679.16           | I-set              | 3.30E-05                    | d1biha3                | b.1.1.4: I-set domains | 97.6                            |
| Alr2                 | D2               | PF13927.6            | Ig_3               | 0.0002                      | d1biha3                | b.1.1.4: I-set domains | 99.0                            |
| Alr2                 | D3               | PF07679.16           | I-set              | 0.0023                      | d1biha3                | b.1.1.4: I-set domains | 96.7                            |
| Alr3                 | D2               |                      |                    |                             | d1biha3                | b.1.1.4: I-set domains | 96.6                            |
| Alr4                 | D2               |                      |                    |                             | d1biha3                | b.1.1.4: I-set domains | 98.7                            |
| Alr6                 | D2               | PF07679.16           | I-set              | 1.70E-05                    | d1biha3                | b.1.1.4: I-set domains | 97.0                            |
| Alr7                 | D2               | PF07679.16           | I-set              | 8.80E-05                    | d1x44a1                | b.1.1.4: I-set domains | 99.3                            |
| Alr8                 | D2a <sup>d</sup> | PF07679.16           | I-set              | 0.0024                      | d1biha3                | b.1.1.4: I-set domains | 97.4                            |
| Alr8                 | D2b <sup>e</sup> | PF07679.16           | I-set              | 2.20E-07                    | d1biha3                | b.1.1.4: I-set domains | 98.1                            |
| Alr9                 | D2               |                      |                    |                             | d1biha3                | b.1.1.4: I-set domains | 97.4                            |
| Alr11                | D2               | PF07679.16           | I-set              | 0.0034                      | d1biha3                | b.1.1.4: I-set domains | 97.1                            |
| Alr12A               | D2               | PF13927.6            | Ig_3               | 0.0028                      | d1biha3                | b.1.1.4: I-set domains | 97.0                            |
| Alr12B               | D2               | PF13927.6            | Ig_3               | 0.0024                      | d1biha3                | b.1.1.4: I-set domains | 97.2                            |
| Alr15                | D2               |                      |                    |                             | d1biha3                | b.1.1.4: I-set domains | 84.9                            |
| Alr16                | D2               | PF07679.16           | I-set              | 0.0021                      | d1biha3                | b.1.1.4: I-set domains | 97.4                            |
| Alr18                | D2               | PF07679.16           | I-set              | 3.50E-06                    | d1biha3                | b.1.1.4: I-set domains | 97.4                            |
| Alr19                | D2               | PF07679.16           | I-set              | 2.50E-06                    | d1biha3                | b.1.1.4: I-set domains | 97.4                            |
| Alr21                | D2               | PF07679.16           | I-set              | 8.10E-05                    | d1biha3                | b.1.1.4: I-set domains | 97.6                            |
| Alr23                | D2               | PF07679.16           | I-set              | 0.0005                      | d1biha3                | b.1.1.4: I-set domains | 97.5                            |
| Alr27                | D2               |                      |                    |                             |                        |                        |                                 |
| Alr28                | D2               | PF07679.16           | I-set              | 0.0076                      | d1vcaa2                | b.1.1.4: I-set domains | 97.4                            |
| Alr29                | D2               |                      |                    |                             | d1ncua1                | b.1.1.4: I-set domains | 85.2                            |
| Alr30                | D2               | PF13927.6            | Ig_3               | 0.00027                     | d1biha3                | b.1.1.4: I-set domains | 97.8                            |
| Alr30                | D3               |                      |                    |                             | d1biha3                | b.1.1.4: I-set domains | 96.9                            |
| Alr31                | D2               |                      |                    |                             | d1ncua1                | b.1.1.4: I-set domains | 87.2                            |
| Alr33                | D2               |                      |                    |                             | d1iray3                | b.1.1.4: I-set domains | 54.4                            |
| Alr34                | D2               |                      |                    |                             | d1biha3                | b.1.1.4: I-set domains | 97.1                            |
| Alr35                | D2               | PF07679.16           | I-set              | 0.0066                      | d1koa1                 | b.1.1.4: I-set domains | 89.8                            |
| Alr36                | D2               |                      |                    |                             | d1biha3                | b.1.1.4: I-set domains | 97.4                            |
| Alr37                | D2               |                      |                    |                             | d1biha3                | b.1.1.4: I-set domains | 78.7                            |
| Alr38                | D2               |                      |                    |                             | d1iray3                | b.1.1.4: I-set domains | 54.7                            |

<sup>a</sup> proteins encoded by *bona fide* genes in blue, putative genes in orange

<sup>b</sup> significance cutoff = 0.01

<sup>c</sup> probability of homology; values <80% not shown; values >95% shaded in green

<sup>d</sup> this is the membrane-distal domain with homology to other domain 1 sequences

<sup>e</sup> this is the membrane-proximal domain with homology to other domain 1 sequences

**Table S6. Predicted structural homology for domains 2 and 3**

| Protein <sup>a</sup> | Domain | Colabfold<br><i>pLDDT</i><br>score <sup>b</sup> | DALI Top Structural Alignment |                             |             |             | PDBeFold Top Structural Alignment         |                         |                             |             |             |                                           |
|----------------------|--------|-------------------------------------------------|-------------------------------|-----------------------------|-------------|-------------|-------------------------------------------|-------------------------|-----------------------------|-------------|-------------|-------------------------------------------|
|                      |        |                                                 | <i>PDB</i><br>accession       | <i>Z-score</i> <sup>c</sup> | <i>RMSD</i> | % <i>ID</i> | <i>Domain</i><br><i>Type</i> <sup>d</sup> | <i>PDB</i><br>accession | <i>Q-score</i> <sup>e</sup> | <i>RMSD</i> | % <i>ID</i> | <i>Domain</i><br><i>Type</i> <sup>d</sup> |
| Alr1                 | D2     | 95.1                                            | <a href="#">2rjmA</a>         | 12.9                        | 1.7         | 19          | I-set                                     | <a href="#">3qp3B</a>   | 0.5999                      | 1.5         | 16          | I-set                                     |
| Alr2                 | D2     | 93.7                                            | <a href="#">1u2hA</a>         | 12.4                        | 1.7         | 16          | I-set                                     | <a href="#">1u2hA</a>   | 0.6237                      | 1.6         | 16          | I-set                                     |
| Alr2                 | D3     | 90.9                                            | <a href="#">6efyA</a>         | 12.9                        | 1.5         | 23          | I-set                                     | <a href="#">3qp3C</a>   | 0.6663                      | 1.3         | 15          | I-set                                     |
| Alr3                 | D2     | 88.2                                            | <a href="#">2rikA</a>         | 12.7                        | 1.8         | 11          | I-set                                     | <a href="#">6h4IA</a>   | 0.6153                      | 1.7         | 13          | I-set                                     |
| Alr4                 | D2     | 94.4                                            | <a href="#">2j8hA</a>         | 13.2                        | 1.4         | 18          | I-set                                     | <a href="#">3pucA</a>   | 0.6466                      | 1.3         | 15          | I-set                                     |
| Alr6                 | D2     | 93.9                                            | <a href="#">2rjmA</a>         | 12.2                        | 1.7         | 15          | I-set                                     | <a href="#">6h4IA</a>   | 0.6019                      | 1.5         | 12          | I-set                                     |
| Alr7                 | D2     | 92.1                                            | <a href="#">2rjmA</a>         | 13.0                        | 1.5         | 16          | I-set                                     | <a href="#">4uowK</a>   | 0.6176                      | 1.5         | 16          | I-set                                     |
| Alr8                 | D2a    | 88.0                                            | <a href="#">2rjmA</a>         | 13.4                        | 1.8         | 21          | I-set                                     | <a href="#">1u2hA</a>   | 0.6517                      | 1.5         | 18          | I-set                                     |
| Alr8                 | D2b    | 92.5                                            | <a href="#">2rjmA</a>         | 13.6                        | 1.4         | 16          | I-set                                     | <a href="#">6h4IA</a>   | 0.6649                      | 1.4         | 17          | I-set                                     |
| Alr9                 | D2     | 81.1                                            | <a href="#">4pgzA</a>         | 10.5                        | 2.6         | 16          | I-set                                     | <a href="#">3j9f8</a>   | 0.5011                      | 2.3         | 12          | I-set/C2-set                              |
| Alr11                | D2     | 88.2                                            | <a href="#">2illa</a>         | 12.1                        | 1.6         | 21          | I-set                                     | <a href="#">1g1cB</a>   | 0.5566                      | 1.7         | 19          | I-set                                     |
| Alr12A               | D2     | 88.4                                            | <a href="#">3pucA</a>         | 12.9                        | 1.6         | 10          | I-set                                     | <a href="#">1g1cA</a>   | 0.5729                      | 1.7         | 23          | I-set                                     |
| Alr12B               | D2     | 85.7                                            | <a href="#">4of8B</a>         | 12.0                        | 2.1         | 13          | I-set/C2-set                              | <a href="#">2wwmT</a>   | 0.5027                      | 2.1         | 22          | I-set                                     |
| Alr15                | D2     | 92.6                                            | <a href="#">4of8B</a>         | 10.8                        | 2.1         | 12          | I-set/C2-set                              | <a href="#">3rghB</a>   | 0.5252                      | 2.0         | 5           | filamin                                   |
| Alr16                | D2     | 85.9                                            | <a href="#">4uow5</a>         | 11.5                        | 2.1         | 19          | I-set                                     | <a href="#">3j9f8</a>   | 0.4915                      | 2.4         | 8           | I-set/C2-set                              |
| Alr18                | D2     | 89.4                                            | <a href="#">2rjmA</a>         | 13.1                        | 1.7         | 24          | I-set                                     | <a href="#">4uowG</a>   | 0.6208                      | 1.6         | 22          | I-set                                     |
| Alr19                | D2     | 92.6                                            | <a href="#">2rjmA</a>         | 12.1                        | 1.8         | 23          | I-set                                     | <a href="#">1g1cA</a>   | 0.588                       | 1.5         | 23          | I-set                                     |
| Alr21                | D2     | 87.5                                            | <a href="#">6efyA</a>         | 12.9                        | 2.0         | 12          | I-set                                     | <a href="#">6h4IA</a>   | 0.6162                      | 1.5         | 8           | I-set                                     |
| Alr23                | D2     | 92.2                                            | <a href="#">4pgzB</a>         | 11.6                        | 2.3         | 14          | I-set                                     | <a href="#">6h4IA</a>   | 0.5576                      | 1.8         | 19          | I-set                                     |
| Alr27                | D2     | 92.4                                            | <a href="#">3sbwC</a>         | 10.7                        | 2.3         | 14          | I-set/C2-set                              | <a href="#">4uowB</a>   | 0.4968                      | 1.8         | 14          | I-set                                     |
| Alr28                | D2     | 91.8                                            | <a href="#">4pgzB</a>         | 13.0                        | 1.9         | 16          | I-set                                     | <a href="#">6h4IA</a>   | 0.6368                      | 1.3         | 16          | I-set                                     |
| Alr29                | D2     | 86.9                                            | <a href="#">4of8B</a>         | 10.6                        | 2.2         | 15          | I-set/C2-set                              | <a href="#">2wwkT</a>   | 0.493                       | 1.8         | 16          | I-set                                     |
| Alr30                | D2     | 90.4                                            | <a href="#">1u2hA</a>         | 12.9                        | 1.6         | 23          | I-set                                     | <a href="#">1u2hA</a>   | 0.6853                      | 1.4         | 24          | I-set                                     |
| Alr30                | D3     | 92.1                                            | <a href="#">2fdbP</a>         | 12.3                        | 1.8         | 12          | I-set                                     | <a href="#">4uowE</a>   | 0.5936                      | 1.7         | 12          | I-set                                     |
| Alr31                | D2     | 84.0                                            | <a href="#">3dmkC</a>         | 11.4                        | 2.4         | 13          | I-set                                     | <a href="#">6h4IA</a>   | 0.5577                      | 1.7         | 15          | I-set                                     |
| Alr33                | D2     | 89.0                                            | <a href="#">6pv9A</a>         | 10.4                        | 2.2         | 7           | I-set/C2-set                              | <a href="#">2kdgA</a>   | 0.5145                      | 1.8         | 21          | I-set                                     |
| Alr34                | D2     | 93.4                                            | <a href="#">2j8hA</a>         | 12.8                        | 1.5         | 20          | I-set                                     | <a href="#">3pucA</a>   | 0.6343                      | 1.5         | 17          | I-set                                     |
| Alr35                | D2     | 95.5                                            | <a href="#">3dmkC</a>         | 12.4                        | 2.3         | 15          | I-set                                     | <a href="#">6h4IA</a>   | 0.5833                      | 1.9         | 16          | I-set                                     |
| Alr36                | D2     | 90.0                                            | <a href="#">2rikA</a>         | 13.4                        | 1.7         | 19          | I-set                                     | <a href="#">6h4IA</a>   | 0.6571                      | 1.4         | 13          | I-set                                     |
| Alr37                | D2     | 92.6                                            | <a href="#">4uowR</a>         | 10.9                        | 2.2         | 13          | I-set                                     | <a href="#">4uowN</a>   | 0.5459                      | 1.9         | 12          | I-set                                     |
| Alr38                | D2     | 91.7                                            | <a href="#">2rikA</a>         | 12.5                        | 1.7         | 16          | I-set                                     | <a href="#">1u2hA</a>   | 0.6147                      | 1.4         | 17          | I-set                                     |

<sup>a</sup> *bona fide* genes in blue, putative genes in red

<sup>b</sup> predicted local-distance difference test score; >90 considered highly accurate

<sup>c</sup> Z-score between 8-20 indicates probable homology between query and hit

<sup>d</sup> as annotated in the PDB (rcsb.org)

<sup>e</sup> Q-score = 1 are identical alignments; >0.5 are considered to have homologous structures

<sup>f</sup> this is the membrane-distal domain with homology to other domain 1 sequences in Alr8

<sup>g</sup> this is the membrane-proximal domain with homology to other domain 1 sequences in Alr8

**Table S7. Sequence homology of the ECS fold**

| Protein <sup>a</sup> | Domain            | HMMER search of pfam |                    |                             | HHpred search of SCOPe |                               |                                 |
|----------------------|-------------------|----------------------|--------------------|-----------------------------|------------------------|-------------------------------|---------------------------------|
|                      |                   | <i>Accession</i>     | <i>description</i> | <i>e-value</i> <sup>b</sup> | <i>Accession</i>       | <i>SCOPe family</i>           | <i>Probability</i> <sup>c</sup> |
| Alr1                 | ECS               |                      |                    |                             | d1j8ka                 | b.1.2.1: Fibronectin type III | 88.1                            |
| Alr2                 | ECS               |                      |                    |                             | d1fyhb1                | b.1.2.1: Fibronectin type III | 84.7                            |
| Alr3                 | ECS               |                      |                    |                             | d3s9db1                | b.1.2.1: Fibronectin type III | 76.6                            |
| Alr4                 | ECS               |                      |                    |                             |                        |                               |                                 |
| Alr6                 | ECS               |                      |                    |                             | d1j8ka                 | b.1.2.1: Fibronectin type III | 88.9                            |
| Alr7                 | ECS               |                      |                    |                             | d1fnfa1                | b.1.2.1: Fibronectin type III | 79.7                            |
| Alr8                 | ECSa <sup>e</sup> |                      |                    |                             | d1j8ka                 | b.1.2.1: Fibronectin type III | 85.1                            |
| Alr8                 | ECSb <sup>f</sup> |                      |                    |                             |                        |                               |                                 |
| Alr9                 | ECS               |                      |                    |                             | d1j8ka                 | b.1.2.1: Fibronectin type III | 81.6                            |
| Alr11                | ECS               |                      |                    |                             | d1j8ka                 | b.1.2.1: Fibronectin type III | 82.4                            |
| Alr12A               | ECS               |                      |                    |                             | d1j8ka                 | b.1.2.1: Fibronectin type III | 81.3                            |
| Alr12B               | ECS               |                      |                    |                             | d1j8ka                 | b.1.2.1: Fibronectin type III | 80.2                            |
| Alr15                | ECS               |                      |                    |                             |                        |                               |                                 |
| Alr16                | ECS               |                      |                    |                             | d1j8ka                 | b.1.2.1: Fibronectin type III | 85.2                            |
| Alr18                | ECS               |                      |                    |                             | d1j8ka                 | b.1.2.1: Fibronectin type III | 87.8                            |
| Alr19                | ECS               |                      |                    |                             | d1j8ka                 | b.1.2.1: Fibronectin type III | 87.8                            |
| Alr21                | ECS               |                      |                    |                             | d1j8ka                 | b.1.2.1: Fibronectin type III | 82.0                            |
| Alr23                | ECS               |                      |                    |                             | d1fnfa1                | b.1.2.1: Fibronectin type III | 79.8                            |
| Alr27                | ECS               |                      |                    |                             |                        |                               |                                 |
| Alr28                | ECS               |                      |                    |                             | d1fyhb1                | b.1.2.1: Fibronectin type III | 75.6                            |
| Alr29                | ECS               |                      |                    |                             |                        |                               |                                 |
| Alr30.1              | ECS               |                      |                    |                             | d1fyhb1                | b.1.2.1: Fibronectin type III | 70.9                            |
| Alr30.3              | ECS               |                      |                    |                             | d1fyhb1                | b.1.2.1: Fibronectin type III | 82.4                            |
| Alr31                | ECS               |                      |                    |                             | d3d85d3                | b.1.2.1: Fibronectin type III | 56.8                            |
| Alr33                | ECS               | PF07403.13           | DUF1505            | 0.0013                      |                        |                               |                                 |
| Alr34                | ECS               |                      |                    |                             |                        |                               |                                 |
| Alr35                | ECS               |                      |                    |                             |                        |                               |                                 |
| Alr36                | ECS               |                      |                    |                             | d1fnfa1                | b.1.2.1: Fibronectin type III | 80.8                            |
| Alr37                | ECS               |                      |                    |                             | d1fnfa1                | b.1.2.1: Fibronectin type III | 74.3                            |
| Alr38                | ECS               |                      |                    |                             | d2gysa2                | b.1.2.1: Fibronectin type III | 60.5                            |

<sup>a</sup> proteins encoded by *bona fide* genes in blue, putative genes in red

<sup>b</sup> significance cutoff = 0.01

<sup>c</sup> probability of homology; values <50% not shown; values >95% shaded in green

<sup>d</sup> this is the membrane-distal domain with homology to other domain 1 sequences

<sup>e</sup> this is the membrane-proximal domain with homology to other domain 1 sequences



**Table S8. Predicted structural homology for the immunoglobulin-like fold in the ECS**

| Protein <sup>a</sup> | Domain | Colabfold<br><i>pLDDT</i><br>score <sup>b</sup> | DALI Top Structural Alignment |                             |             |             |                                           | PDBeFold Top Structural Alignment |                             |             |             |                                           |
|----------------------|--------|-------------------------------------------------|-------------------------------|-----------------------------|-------------|-------------|-------------------------------------------|-----------------------------------|-----------------------------|-------------|-------------|-------------------------------------------|
|                      |        |                                                 | <i>PDB</i><br>accession       | <i>Z-score</i> <sup>c</sup> | <i>RMSD</i> | % <i>ID</i> | <i>Domain</i><br><i>Type</i> <sup>d</sup> | <i>PDB</i><br>accession           | <i>Q-score</i> <sup>e</sup> | <i>RMSD</i> | % <i>ID</i> | <i>Domain</i><br><i>Type</i> <sup>d</sup> |
| Alr1                 | ECS    | 90.0                                            | <a href="#">6h41A</a>         | 11.4                        | 1.8         | 13          | Fn3                                       | <a href="#">7jguA</a>             | 0.5781                      | 1.5         | 16          | Fn3                                       |
| Alr2                 | ECS    | 95.6                                            | <a href="#">5fn8A</a>         | 12.9                        | 1.5         | 22          | Fn3                                       | <a href="#">5dc0A</a>             | 0.6019                      | 1.6         | 12          | Fn3                                       |
| Alr3                 | ECS    | 94.1                                            | <a href="#">5fn6A</a>         | 12.4                        | 1.7         | 10          | Fn3                                       | <a href="#">5n48D</a>             | 0.5855                      | 1.8         | 8           | Fn3                                       |
| Alr4                 | ECS    | 95.4                                            | <a href="#">7e9jB</a>         | 12.7                        | 1.8         | 15          | Fn3                                       | <a href="#">7jgtA</a>             | 0.5270                      | 2.0         | 13          | Fn3                                       |
| Alr6                 | ECS    | 94.0                                            | <a href="#">7e9kD</a>         | 13.2                        | 1.4         | 16          | Fn3                                       | <a href="#">1jrhI</a>             | 0.5330                      | 1.6         | 5           | Fn3                                       |
| Alr7                 | ECS    | 90.0                                            | <a href="#">5fn6A</a>         | 12.2                        | 1.7         | 9           | Fn3                                       | <a href="#">5n48D</a>             | 0.5501                      | 1.9         | 10          | Fn3                                       |
| Alr8 <sup>g</sup>    | ECSa   | 91.1                                            | <a href="#">7e9jB</a>         | 13.0                        | 1.5         | 14          | Fn3                                       | <a href="#">2rb8A</a>             | 0.5490                      | 2.2         | 10          | Fn3                                       |
| Alr8 <sup>h</sup>    | ECSb   | 92.1                                            | <a href="#">5fn6A</a>         | 13.4                        | 1.8         | 10          | Fn3                                       | <a href="#">2rb8A</a>             | 0.5852                      | 1.8         | 6           | Fn3                                       |
| Alr9                 | ECS    | 94.7                                            | <a href="#">5fn8A</a>         | 13.6                        | 1.4         | 16          | Fn3                                       | <a href="#">7jguA</a>             | 0.5956                      | 1.6         | 16          | Fn3                                       |
| Alr11                | ECS    | 95.1                                            | <a href="#">5fn8A</a>         | 10.5                        | 2.6         | 18          | Fn3                                       | <a href="#">1tenA</a>             | 0.5988                      | 1.7         | 11          | Fn3                                       |
| Alr12A               | ECS    | 95.3                                            | <a href="#">5fn8A</a>         | 12.1                        | 1.6         | 14          | Fn3                                       | <a href="#">7jguA</a>             | 0.5975                      | 1.6         | 12          | Fn3                                       |
| Alr12B               | ECS    | 94.2                                            | <a href="#">5x83B</a>         | 12.9                        | 1.6         | 9           | Fn3                                       | <a href="#">7jguA</a>             | 0.5947                      | 1.6         | 11          | Fn3                                       |
| Alr15                | ECS    | 93.9                                            | <a href="#">2geeA</a>         | 12.0                        | 2.1         | 10          | Fn3                                       | <a href="#">3rzwA</a>             | 0.6084                      | 1.6         | 8           | Fn3                                       |
| Alr16                | ECS    | 93.7                                            | <a href="#">5fn6A</a>         | 10.8                        | 2.1         | 13          | Fn3                                       | <a href="#">1tenA</a>             | 0.5925                      | 1.8         | 6           | Fn3                                       |
| Alr18                | ECS    | 93.1                                            | <a href="#">6h41A</a>         | 11.5                        | 2.1         | 8           | Fn3                                       | <a href="#">7jguA</a>             | 0.6015                      | 1.6         | 12          | Fn3                                       |
| Alr19                | ECS    | 94.5                                            | <a href="#">5fn6A</a>         | 13.1                        | 1.7         | 14          | Fn3                                       | <a href="#">7jguA</a>             | 0.5960                      | 1.7         | 14          | Fn3                                       |
| Alr21                | ECS    | 93.9                                            | <a href="#">5fn6A</a>         | 12.1                        | 1.8         | 13          | Fn3                                       | <a href="#">5n48D</a>             | 0.5829                      | 1.9         | 10          | Fn3                                       |
| Alr23                | ECS    | 84.7                                            | <a href="#">6xfiA</a>         | 12.9                        | 2.0         | 15          | Fn3                                       | <a href="#">4wtwB</a>             | 0.5724                      | 1.6         | 18          | Fn3                                       |
| Alr27                | ECS    | 94.3                                            | <a href="#">2geeA</a>         | 11.6                        | 2.3         | 13          | Fn3                                       | <a href="#">5oc7B</a>             | 0.6465                      | 1.7         | 15          | Fn3                                       |
| Alr28                | ECS    | 92.4                                            | <a href="#">3t1wA</a>         | 10.7                        | 2.3         | 11          | Fn3                                       | <a href="#">5n48D</a>             | 0.6033                      | 1.9         | 12          | Fn3                                       |
| Alr30.1              | ECS    | 88.2                                            | <a href="#">3t1wA</a>         | 13.0                        | 1.9         | 14          | Fn3                                       | <a href="#">4wtwA</a>             | 0.5870                      | 1.8         | 14          | Fn3                                       |
| Alr30.3              | ECS    | 85.9                                            | <a href="#">6mojB</a>         | 10.6                        | 2.2         | 12          | Fn3                                       | <a href="#">5n06A</a>             | 0.4340                      | 2.2         | 15          | Fn3                                       |
| Alr31                | ECS    | 92.4                                            | <a href="#">5fn8B</a>         | 12.9                        | 1.6         | 12          | Fn3                                       | <a href="#">5dc0A</a>             | 0.5683                      | 2.0         | 7           | Fn3                                       |
| Alr33                | ECS    | 89.6                                            | <a href="#">3t1wA</a>         | 12.3                        | 1.8         | 10          | Fn3                                       | <a href="#">2rb8A</a>             | 0.6074                      | 2.0         | 10          | Fn3                                       |
| Alr34                | ECS    | 92.3                                            | <a href="#">5n48D</a>         | 11.4                        | 2.4         | 7           | Fn3                                       | <a href="#">5dc0A</a>             | 0.5811                      | 2.0         | 7           | Fn3                                       |
| Alr35                | ECS    | 96.5                                            | <a href="#">5n48D</a>         | 10.4                        | 2.2         | 7           | Fn3                                       | <a href="#">5n48B</a>             | 0.6154                      | 1.9         | 7           | Fn3                                       |
| Alr36                | ECS    | 93.1                                            | <a href="#">5fn8B</a>         | 12.8                        | 1.5         | 8           | Fn3                                       | <a href="#">7jguA</a>             | 0.5872                      | 1.7         | 20          | Fn3                                       |
| Alr37                | ECS    | 92.0                                            | <a href="#">5n48D</a>         | 12.4                        | 2.3         | 9           | Fn3                                       | <a href="#">5n48D</a>             | 0.5964                      | 1.9         | 10          | Fn3                                       |
| Alr38                | ECS    | 92.2                                            | <a href="#">5n48D</a>         | 13.4                        | 1.7         | 11          | Fn3                                       | <a href="#">5n48D</a>             | 0.6182                      | 1.8         | 9           | Fn3                                       |

<sup>a</sup> *bona fide* genes in blue, putative genes in red<sup>b</sup> predicted local-distance difference test score; >90 considered highly accurate<sup>c</sup> Z-score between 8-20 indicates probable homology between query and hit<sup>d</sup> as annotated in the PDB (rcsb.org)<sup>e</sup> Q-score = 1 are identical alignments; >0.5 are considered to have homologous structures<sup>f</sup> this is the membrane-distal domain with homology to other domain 1 sequences in Alr8<sup>g</sup> this is the membrane-proximal domain with homology to other domain 1 sequences in Alr8

**Table S9. Structural predictions of tandem I-set and FnIII-like domains**

| Protein <sup>a</sup> | Tandem Domains<br>I-set/FnIII-like | Colabfold<br><i>pI</i> DDT score <sup>b</sup> |
|----------------------|------------------------------------|-----------------------------------------------|
| Alr1                 | D2-ECS                             | 92.2                                          |
| Alr2                 | D3-ECS                             | 92.5                                          |
| Alr3                 | D2-ECS                             | 89.8                                          |
| Alr4                 | D2-ECS                             | 95.2                                          |
| Alr6                 | D2-ECS                             | 93.6                                          |
| Alr7                 | D2-ECS                             | 92.7                                          |
| Alr8                 | D2a-ECSa                           | 91.4                                          |
| Alr8                 | D2b-ECSb                           | 92.9                                          |
| Alr9                 | D2-ECS                             | 92.0                                          |
| Alr11                | D2-ECS                             | 93.7                                          |
| Alr12A               | D2-ECS                             | 92.6                                          |
| Alr12B               | D2-ECS                             | 93.2                                          |
| Alr15                | D2-ECS                             | 76.7                                          |
| Alr16                | D2-ECS                             | 91.9                                          |
| Alr18                | D2-ECS                             | 92.3                                          |
| Alr19                | D2-ECS                             | 94.7                                          |
| Alr21                | D2-ECS                             | 92.5                                          |
| Alr23                | D2-ECS                             | 85.0                                          |
| Alr27                | D2-ECS                             | 91.7                                          |
| Alr28                | D2-ECS                             | 90.0                                          |
| Alr30                | D3-ECS                             | 87.6                                          |
| Alr31                | D2-ECS                             | 74.2                                          |
| Alr33                | D2-ECS                             | 87.3                                          |
| Alr34                | D2-ECS                             | 88.2                                          |
| Alr35                | D2-ECS                             | 95.7                                          |
| Alr36                | D2-ECS                             | 93.9                                          |
| Alr37                | D2-ECS                             | 86.4                                          |
| Alr38                | D2-ECS                             | 88.0                                          |

<sup>a</sup> *bona fide* genes in blue, putative genes in red

<sup>b</sup> predicted local-distance difference test score; values >90 are considered highly accurate

(Note: All Datasets are plain text files)

- Dataset S1. FASTA formatted sequence of the ARC-F reference. Two gaps of unknown physical size are denoted with N's.
- Dataset S2. GFF3-formatted annotations of *Alr* genes in the ARC-F reference sequence.
- Dataset S3. FASTA formatted sequence of contig utg718000000456, which contains *Alr37*.
- Dataset S4. GFF3-formatted annotation of *Alr37* on contig utg718000000456.
- Dataset S5. FASTA-formatted sequence of contig utg718000000115, which contains *Alr38*.
- Dataset S6. GFF3-formatted annotation of *Alr38* on contig utg718000000115
- Dataset S7. FASTA-formatted cDNA sequences of bona fide genes in the *Alr* gene family.
- Dataset S8. FASTA-formatted amino acid sequences of *Alr* proteins encoded by *bona fide* genes.
- Dataset S9. FASTA-formatted cDNA sequences of putative genes in the *Alr* gene family.
- Dataset S10. FASTA-formatted amino acid sequences of *Alr* proteins encoded by putative genes.
- Dataset S11. FASTA-formatted MAFFT alignment of amino acid sequences for domain 1 from *bona fide* and putative *Alr* genes.
- Dataset S12. FASTA-formatted MAFFT alignment of amino acid sequences for domains 2 and 3 from *bona fide* and putative *Alr* genes.
- Dataset S13. FASTA-formatted MAFFT alignment of amino acid sequences for the ECS from *bona fide* and putative *Alr* genes.
- Dataset S14. FASTA-formatted amino acid sequences of the trimmed ECS used for structural predictions and alignment to fibronectin III domains.

## SI References

1. Cadavid LF, Powell AE, Nicotra ML, Moreno M, Buss LW. An invertebrate histocompatibility complex. *Genetics*. 2004;167: 357–365.
2. Berlin K, Koren S, Chin C-S, Drake JP, Landolin JM, Phillippy AM. Assembling large genomes with single-molecule sequencing and locality-sensitive hashing. *Nat Biotechnol*. 2015;33: 623–630.
3. Chin C-S, Alexander DH, Marks P, Klammer AA, Drake J, Heiner C, et al. Nonhybrid, finished microbial genome assemblies from long-read SMRT sequencing data. *Nat Methods*. 2013;10: 563–569.
4. Walker BJ, Abeel T, Shea T, Priest M, Abouelliel A, Sakthikumar S, et al. Pilon: an integrated tool for comprehensive microbial variant detection and genome assembly improvement. *PLoS One*. 2014;9: e112963.
5. Kurtz S, Phillippy A, Delcher AL, Smoot M, Shumway M, Antonescu C, et al. Versatile and open software for comparing large genomes. *Genome Biol*. 2004;5: R12.
6. Camacho C, Coulouris G, Avagyan V, Ma N, Papadopoulos J, Bealer K, et al. BLAST+: architecture and applications. *BMC Bioinformatics*. 2009;10: 421.
7. Noe L, Kucherov G. YASS: enhancing the sensitivity of DNA similarity search. *Nucleic Acids Research*. 2005. pp. W540–W543. doi:10.1093/nar/gki478
8. Kim D, Paggi JM, Park C, Bennett C, Salzberg SL. Graph-based genome alignment and genotyping with HISAT2 and HISAT-genotype. *Nat Biotechnol*. 2019;37: 907–915.
9. Li H, Handsaker B, Wysoker A, Fennell T, Ruan J, Homer N, et al. The Sequence Alignment/Map format and SAMtools. *Bioinformatics*. 2009;25: 2078–2079.
10. Trapnell C, Williams BA, Pertea G, Mortazavi A, Kwan G, van Baren MJ, et al. Transcript assembly and quantification by RNA-Seq reveals unannotated transcripts and isoform switching during cell differentiation. *Nat Biotechnol*. 2010;28: 511–515.
11. Dunn NA, Unni DR, Diesh C, Munoz-Torres M, Harris NL, Yao E, et al. Apollo: Democratizing genome annotation. *PLoS Comput Biol*. 2019;15: e1006790.
12. Smit AFA, Hubley R, Green P. RepeatMasker Open-4.0. In: RepeatMasker [Internet]. 2015 [cited 15 Jul 2020]. Available: <http://www.repeatmasker.org>
13. Kim D, Langmead B, Salzberg SL. HISAT: a fast spliced aligner with low memory requirements. *Nat Methods*. 2015;12: 357–360.
14. Katoh K, Toh H. Parallelization of the MAFFT multiple sequence alignment program. *Bioinformatics*. 2010;26: 1899–1900.
15. Waterhouse AM, Procter JB, Martin DMA, Clamp M, Barton GJ. Jalview Version 2—a multiple sequence alignment editor and analysis workbench. *Bioinformatics*. 2009;25: 1189–1191.

16. Fu L, Niu B, Zhu Z, Wu S, Li W. CD-HIT: accelerated for clustering the next-generation sequencing data. *Bioinformatics*. 2012;28: 3150–3152.
17. Letunic I, Bork P. Interactive Tree Of Life (iTOL) v4: recent updates and new developments. *Nucleic Acids Res*. 2019;47: W256–W259.
18. Armenteros JJA, Tsirigos KD, Sønderby CK, Petersen TN, Winther O, Brunak S, et al. SignalP 5.0 improves signal peptide predictions using deep neural networks. *Nat Biotechnol*. 2019;37: 420–423.
19. Krogh A, Larsson B, Von Heijne G, Sonnhammer ELL. Predicting transmembrane protein topology with a hidden Markov model: application to complete genomes. *J Mol Biol*. 2001;305: 567–580.
20. El-Gebali S, Mistry J, Bateman A, Eddy SR, Luciani A, Potter SC, et al. The Pfam protein families database in 2019. *Nucleic Acids Res*. 2019;47: D427–D432.
21. Zimmermann L, Stephens A, Nam S-Z, Rau D, Kübler J, Lozajic M, et al. A Completely Reimplemented MPI Bioinformatics Toolkit with a New HHpred Server at its Core. *J Mol Biol*. 2018;430: 2237–2243.
22. Mirdita M, Ovchinnikov S, Steinegger M. ColabFold - Making protein folding accessible to all. *bioRxiv*. 2021. p. 2021.08.15.456425. doi:10.1101/2021.08.15.456425
23. Heinig M, Frishman D. STRIDE: a web server for secondary structure assignment from known atomic coordinates of proteins. *Nucleic Acids Research*. 2004. pp. W500–W502. doi:10.1093/nar/gkh429
24. Holm L. Using Dali for Protein Structure Comparison. In: Gáspári Z, editor. *Structural Bioinformatics: Methods and Protocols*. New York, NY: Springer US; 2020. pp. 29–42.
25. Krissinel E, Henrick K. Secondary-structure matching (SSM), a new tool for fast protein structure alignment in three dimensions. *Acta Crystallogr D Biol Crystallogr*. 2004;60: 2256–2268.
26. Schrödinger, LLC. The PyMOL Molecular Graphics System, Version 2.3. 2020.
27. Powell AE, Nicotra ML, Moreno MA, Lakkis FG, Dellaporta SL, Buss LW. Differential effect of allorecognition loci on phenotype in *Hydractinia symbiolongicarpus* (Cnidaria: Hydrozoa). *Genetics*. 2007;177: 2101–2107.
28. Nicotra ML, Powell AE, Rosengarten RD, Moreno M, Grimwood J, Lakkis FG, et al. A hypervariable invertebrate allodeterminant. *Curr Biol*. 2009;19: 583–589.
29. Rosa SF, Powell AE, Rosengarten RD, Nicotra ML, Moreno MA, Grimwood J, et al. *Hydractinia* allodeterminant *alr1* resides in an immunoglobulin superfamily-like gene complex. *Curr Biol*. 2010;20: 1122–1127.
30. Cannon JP, Haire RN, Litman GW. Identification of diversified genes that contain immunoglobulin-like variable regions in a protochordate. *Nat Immunol*. 2002;3: 1200–1207.
